# Supplementary material
Source: publisher figshare collection journal article supplement (https://gsapubs.figshare.com/articles/dataset/_/12533480)
Supplement: Supplementary file 1 [file 1]

## Sheet: 1A
		U-Pb LA-ICPMS detrital zircon data
		Sample Location: GSQ McKinlay-1 core (sample name: McKinlay-02; collected from core box 02), McKinlay, Queensland
		Formation: Upper Winton Formation
		Samples Description: Coarse-grained sandstone; collected (depth of 9.16-9.54, box 2)
		Sample #	Th	U	Th/U	Pb207	±	Pb206	±	Error	Pb206	± 1σ	Pb207	± 1σ	Pb207	± 1σ	Preferred	± 1σ
		GSQ McKinlay-02	(In PPM)	(In PPM)		/U235	1σ	/U238	1σ	Corr.	/U238 *1	(Ma)	/U235	(Ma)	/Pb206	(Ma)	Age	(Ma)
		McKinlay-02_SH042	378.7	589.17	0.642769	0.09586	0.00465	0.01452	0.00021	0.298152	92.9	1.3	92.9	4.3	92.5	114.77	92.9	1.3
		McKinlay-02_SH060	484.36	616.51	0.785648	0.09682	0.00674	0.01467	0.00028	0.274178	93.9	1.75	93.8	6.24	90.6	162.49	93.9	1.75
		McKinlay-02_SH061	53.53	62.3	0.85923	0.0989	0.01303	0.01485	0.00045	0.230005	95	2.88	95.8	12.04	114.3	290.88	95	2.88
		McKinlay-02_SH067	146.96	332.88	0.44148	0.10262	0.00622	0.01533	0.00025	0.269054	98	1.6	99.2	5.73	127.2	141.71	98	1.6
		McKinlay-02_SH048	111.15	166.18	0.668853	0.10383	0.01433	0.01546	0.00052	0.243708	98.9	3.29	100.3	13.18	135.9	301.33	98.9	3.29
		McKinlay-02_SH072	140.46	381.02	0.368642	0.10261	0.00471	0.01546	0.00021	0.295923	98.9	1.32	99.2	4.34	106.2	109.12	98.9	1.32
		McKinlay-02_SH076	259.1	290.22	0.892771	0.10437	0.00812	0.01552	0.00031	0.256738	99.3	1.96	100.8	7.47	137.8	179.1	99.3	1.96
		McKinlay-02_SH052	140.57	151.64	0.926998	0.10639	0.01034	0.01595	0.00037	0.238683	102	2.35	102.7	9.49	118.3	219.04	102	2.35
		McKinlay-02_SH087	153.66	223.65	0.687056	0.10991	0.0102	0.01645	0.00038	0.248917	105.2	2.44	105.9	9.33	120.9	211.89	105.2	2.44
		McKinlay-02_SH033	60.09	78.18	0.768611	0.10897	0.01074	0.01648	0.0004	0.246267	105.4	2.52	105	9.84	96.2	223.12	105.4	2.52
		McKinlay-02_SH079	49.49	109.36	0.452542	0.11132	0.01169	0.01675	0.00042	0.238777	107.1	2.69	107.2	10.68	110.1	237.66	107.1	2.69
		McKinlay-02_SH027	116.56	148.07	0.787195	0.1157	0.0251	0.01699	0.0009	0.244179	108.6	5.73	111.2	22.84	168.7	448.92	108.6	5.73
		McKinlay-02_SH085	82.51	145.26	0.568016	0.1146	0.01068	0.01715	0.0004	0.25027	109.6	2.51	110.2	9.73	122.8	213.36	109.6	2.51
		McKinlay-02_SH075	62.5	113.15	0.552364	0.11441	0.00643	0.01727	0.00026	0.267876	110.4	1.63	110	5.86	102	131.88	110.4	1.63
		McKinlay-02_SH062	217.99	279.67	0.779454	0.11532	0.00918	0.01733	0.00036	0.260955	110.7	2.25	110.8	8.36	113	182.75	110.7	2.25
		McKinlay-02_SH040	257.96	503.73	0.5121	0.11889	0.00634	0.01781	0.00027	0.284286	113.8	1.72	114.1	5.76	119.4	123.84	113.8	1.72
		McKinlay-02_SH090	197.629	243.674	0.811039	0.11832	0.00853	0.01783	0.00033	0.256727	113.9	2.12	113.5	7.75	106.6	169.78	113.9	2.12
		McKinlay-02_SH007	167.75	309.73	0.541601	0.13123	0.01171	0.01853	0.00044	0.266105	118.4	2.79	125.2	10.51	257.5	197.76	118.4	2.79
		McKinlay-02_SH066	77.66	149.52	0.519395	0.12722	0.01165	0.01875	0.00043	0.250436	119.8	2.72	121.6	10.49	157.2	206.44	119.8	2.72
		McKinley_02_SH018	85.35	191.36	0.446018	0.12936	0.03276	0.01891	0.00124	0.258932	120.8	7.84	123.5	29.45	176.8	514.49	120.8	7.84
		McKinlay-02_SH081	168.74	275.47	0.612553	0.12681	0.0144	0.01903	0.00053	0.245261	121.5	3.35	121.2	12.97	116.6	255.97	121.5	3.35
		McKinlay-02_SH038	274.92	442.49	0.621302	0.13201	0.00698	0.01945	0.00029	0.281987	124.2	1.86	125.9	6.26	159	121.81	124.2	1.86
		McKinlay-02_SH014	118.15	216.58	0.545526	0.13531	0.02049	0.02009	0.0008	0.262965	128.2	5.08	128.9	18.33	141.5	329.09	128.2	5.08
		McKinlay-02_SH024	175.96	272.45	0.645843	0.13772	0.03225	0.02057	0.00125	0.259503	131.3	7.91	131	28.78	126.8	483.78	131.3	7.91
		McKinlay-02_SH036	36.1	90.39	0.39938	0.13933	0.02632	0.0208	0.00093	0.236689	132.7	5.89	132.5	23.46	129.2	399.75	132.7	5.89
		McKinlay-02_SH083	56.02	113.42	0.493916	0.14372	0.02697	0.02138	0.00097	0.241769	136.4	6.09	136.4	23.95	136.9	401.86	136.4	6.09
		McKinlay-02_SH068	36.92	101.92	0.362245	0.14356	0.01408	0.02141	0.00052	0.247638	136.6	3.29	136.2	12.5	130.2	222.04	136.6	3.29
		McKinlay-02_SH050	217.98	351.84	0.619543	0.17261	0.01139	0.0253	0.00046	0.275537	161.1	2.86	161.7	9.86	170.5	150.49	161.1	2.86
		McKinlay-02_SH077	131.93	168.7	0.782039	0.17222	0.00839	0.02531	0.00035	0.283856	161.1	2.23	161.3	7.27	164.4	114.34	161.1	2.23
		McKinlay-02_SH080	222.05	359.57	0.617543	0.17396	0.00774	0.02555	0.00034	0.299086	162.7	2.15	162.8	6.7	165.7	105.05	162.7	2.15
		McKinlay-02_SH032	124.67	172.5	0.722725	0.18373	0.02255	0.02679	0.00082	0.249387	170.4	5.17	171.3	19.34	184	267.82	170.4	5.17
		McKinlay-02_SH009	104.71	156.66	0.66839	0.19759	0.01826	0.02792	0.00069	0.267422	177.5	4.3	183.1	15.48	255.9	203.95	177.5	4.3
		McKinlay-02_SH031	99.62	147.26	0.676491	0.19364	0.0312	0.02816	0.0011	0.242438	179	6.91	179.7	26.54	190	343.3	179	6.91
		McKinlay-02_SH069	83.74	151.78	0.55172	0.19636	0.0247	0.0286	0.0009	0.250168	181.8	5.62	182	20.96	185.8	276.1	181.8	5.62
		McKinlay-02_SH041	244.25	287.49	0.849595	0.20412	0.01452	0.02944	0.00057	0.27218	187	3.55	188.6	12.25	209.1	159.81	187	3.55
		McKinlay-02_SH021	163.39	264.22	0.618386	0.20659	0.03556	0.02953	0.00134	0.263626	187.6	8.4	190.7	29.93	229.3	362.64	187.6	8.4
		McKinlay-02_SH019	215.87	258.31	0.835701	0.20695	0.02329	0.02998	0.0009	0.266751	190.4	5.66	191	19.59	198	247.97	190.4	5.66
		McKinlay-02_SH047	85.83	134.57	0.637809	0.21387	0.01837	0.03106	0.00069	0.258636	197.2	4.31	196.8	15.36	192.2	192.55	197.2	4.31
		McKinlay-02_SH073	879.5	845.49	1.04023	0.22718	0.0136	0.03243	0.00054	0.278149	205.7	3.37	207.9	11.26	232.1	137.94	205.7	3.37
		McKinlay-02_SH055	13.81	26.96	0.51224	0.23124	0.06753	0.03256	0.0022	0.231369	206.5	13.73	211.2	55.69	263.5	571.04	206.5	13.73
		McKinlay-02_SH029	672.54	568.23	1.18357	0.23953	0.02513	0.03378	0.00096	0.270881	214.1	5.96	218	20.59	261.3	224.6	214.1	5.96
		McKinly-02_SH071	386.77	397.37	0.973325	0.23862	0.01348	0.03429	0.00055	0.283931	217.4	3.41	217.3	11.05	216.7	130.93	217.4	3.41
		McKinlay-02_SH051	36.98	126.17	0.293097	0.25182	0.04867	0.03491	0.00168	0.248994	221.2	10.45	228.1	39.48	299.6	397.43	221.2	10.45
		McKinlay-02_SH049	70.44	103.2	0.682558	0.26306	0.014	0.03625	0.00054	0.279906	229.6	3.38	237.1	11.25	313	119.68	229.6	3.38
		McKinlay-02_SH017	278.24	318.1	0.874693	0.26276	0.05599	0.03768	0.0021	0.261551	238.4	13.04	236.9	45.02	222.3	440.18	238.4	13.04
		McKinlay-02_SH012	809.53	885.87	0.913825	0.26683	0.02293	0.03857	0.0009	0.271534	244	5.6	240.2	18.38	203.4	193.14	244	5.6
		McKinlay-02_SH078	118.68	245.55	0.483323	0.29658	0.01252	0.04172	0.00054	0.30661	263.5	3.37	263.7	9.8	265.9	97.93	263.5	3.37
		McKinlay-02_SH063	65.49	122.88	0.532959	0.31073	0.02233	0.0427	0.00083	0.270486	269.5	5.13	274.7	17.3	318.9	159.43	269.5	5.13
		McKinlay-02_SH057	30.05	65.82	0.456548	0.31561	0.02927	0.04363	0.00103	0.254554	275.3	6.36	278.5	22.59	305.9	203.13	275.3	6.36
		McKinlay-02_SH006	583.59	338.51	1.724	0.34042	0.02952	0.04365	0.00102	0.269473	275.4	6.32	297.5	22.36	474.1	186.57	275.4	6.32
		McKinlay-02_SH058	179.05	275.94	0.648873	0.31881	0.01601	0.04425	0.00065	0.29251	279.1	3.99	281	12.33	296.3	114.41	279.1	3.99
		McKinlay-02_SH084	114.16	238.93	0.477797	0.43437	0.03884	0.05793	0.00138	0.266413	363	8.4	366.3	27.5	387.7	196.47	363	8.4
		McKinlay-02_SH005	71.39	88.6	0.805756	0.64228	0.05822	0.08052	0.00196	0.268537	499.2	11.71	503.7	35.99	524.3	192.35	499.2	11.71
		McKinlay-02_SH043	344.24	71.66	4.8038	0.63422	0.04165	0.08064	0.00145	0.273806	500	8.64	498.7	25.88	492.5	142.1	500	8.64
		McKinlay-02_SH039	41.36	166.34	0.248647	0.64314	0.02662	0.08138	0.00107	0.317661	504.4	6.35	504.2	16.45	503.1	91.24	504.4	6.35
		McKinlay-02_SH035	25.61	72.05	0.355448	0.65718	0.0475	0.08267	0.00167	0.279485	512	9.97	512.9	29.1	516.5	154.74	512	9.97
		McKinlay-02_SH020	29.98	73.76	0.406453	0.67335	0.06988	0.08372	0.00235	0.270475	518.3	13.96	522.7	42.4	542.6	217.28	518.3	13.96
		McKinlay-02_SH074	42.36	219.4	0.193072	0.71176	0.03981	0.08663	0.00144	0.297191	535.6	8.51	545.8	23.62	589.5	121.3	535.6	8.51
		McKinlay-02_SH003	120.35	242.46	0.496371	0.69969	0.05907	0.08884	0.00203	0.270661	548.7	12.03	538.6	35.29	496	181.02	548.7	12.03
		McKinlay-02_SH082	46.9	101.09	0.463943	0.7193	0.04053	0.08901	0.00144	0.287116	549.7	8.55	550.3	23.94	552.8	123.48	549.7	8.55
		McKinlay-02_SH001	32.21	572.29	0.0562827	0.86708	0.0729	0.10259	0.00234	0.271295	629.6	13.66	634	39.65	650	175.3	629.6	13.66
		McKinlay-02_SH013	529.21	740.07	0.715081	1.04658	0.4122	0.11774	0.01232	0.265675	717.5	71.03	727.2	204.51	756.1	682.01	717.5	71.03
		McKinlay-02_SH045	33.77	67.82	0.497936	1.76761	0.05523	0.16756	0.00196	0.374367	998.6	10.81	1033.6	20.26	1108.6	63.24	1108.6	63.24
								Legend
				Mesozoic dated grains
				Paleozoic dated grains
				All grains older then 1Ga
			Notes:
			*Age is calculated by error propagation and included errors
			*U and U/Th concentrations are calculated against NIST 612 and are within ~20% error
			*Spot size: 32µm
			*Energy levels at 6 J/cm2 at 193 nm
			*All grains older then 1000 Ma, preferred ages are based on Pb207/Pb206
			*Grains younger then 350 Ma (based on Pb206/U238), which exhibited greater then ≥ 30% discordance
			or high common lead (Pb2006/Pb204 <1000) were excluded
			*Grains older then 350 Ma (based on Pb206/U238), which exhibited greater then ≥ 15% discordance
			or high common lead (Pb2006/Pb204 <1000) were excluded
			*1 Age correction completed by Isoplot (AGE7Corr)

## Sheet: 1B
		U-Pb LA-ICPMS detrital zircon data
		Sample Location: GSQ McKinlay-1 core (sample name: McKinlay_16; collected from core box 16), McKinlay, Queensland
		Formation: Middle Winton Formation
		Samples Description: Fine-grained silstone to silty-mudstone; collected (depth of 342.2-343.3, box 16)
		Sample #	Th	U	Th/U	Pb207	±	Pb206	±	Error	Pb206	± 1σ	Pb207	± 1σ	Pb207	± 1σ	Preferred	± 1σ
		GSQ McKinlay-16	(In PPM)	(In PPM)		/U235	1σ	/U238	1σ	Corr.	/U238 *1	(Ma)	/U235	(Ma)	/Pb206	(Ma)	Age	(Ma)
		McKinlay-16_SH048	243.02	308.3	0.788258	0.08798	0.00774	0.01336	0.00029	0.246737	85.5	1.86	85.6	7.23	87.8	202.63	85.5	1.86
		McKinlay-16_SH063	214.11	262.92	0.814354	0.09552	0.00893	0.01433	0.00034	0.253791	91.7	2.15	92.6	8.27	117.6	213.1	91.7	2.15
		McKinlay-16_SH020	321.21	529.83	0.606251	0.09805	0.0055	0.01459	0.00024	0.293252	93.4	1.5	95	5.09	136.5	129.48	93.4	1.5
		McKinlay-16_SH059	677.07	837.61	0.808336	0.09673	0.00358	0.01465	0.00018	0.331981	93.8	1.13	93.8	3.31	92.9	89.61	93.8	1.13
		McKinlay-16_SH072	488.68	414.96	1.17766	0.09714	0.00412	0.01469	0.00018	0.288903	94	1.16	94.1	3.81	96.8	102.57	94	1.16
		McKinlay-16_SH002	241.16	456.58	0.528188	0.09807	0.0038	0.01483	0.00018	0.313245	94.9	1.13	95	3.51	97.7	92.92	94.9	1.13
		McKinlay-16_SH056	73.78	96.99	0.760697	0.09935	0.01054	0.015	0.00037	0.232508	96	2.35	96.2	9.74	102.2	239.01	96	2.35
		McKinlay-16_SH084	165.94	230.94	0.718542	0.1012	0.0133	0.01519	0.0005	0.250462	97.2	3.16	97.9	12.27	115.1	292.55	97.2	3.16
		McKinlay-16_SH024	165.34	289.08	0.571952	0.10066	0.00936	0.0152	0.00036	0.254706	97.3	2.25	97.4	8.64	101.3	210.68	97.3	2.25
		McKinlay-16_SH064	303.08	316.94	0.956269	0.10051	0.00691	0.01522	0.00028	0.267593	97.4	1.75	97.2	6.37	93.5	161.39	97.4	1.75
		McKinlay-16_SH078	239.03	294.17	0.812557	0.1006	0.00441	0.01523	0.00019	0.284586	97.4	1.23	97.3	4.07	93.5	106.03	97.4	1.23
		McKinlay-16_SH009	461.28	595.97	0.773999	0.10229	0.01372	0.01531	0.00052	0.253225	98	3.27	98.9	12.64	123.7	291.85	98	3.27
		McKinlay-16_SH014	166.53	225.35	0.738984	0.10399	0.01339	0.01536	0.00049	0.247751	98.2	3.1	100.5	12.31	153.5	281.78	98.2	3.1
		McKinlay-16_SH019	134.44	208.27	0.645508	0.10217	0.00972	0.01541	0.00036	0.24556	98.6	2.27	98.8	8.95	105.4	215.21	98.6	2.27
		McKinlay-16_SH037	306.64	271.91	1.12773	0.10221	0.00989	0.01547	0.00037	0.247177	99	2.36	98.8	9.11	94.4	220.29	99	2.36
		McKinlay-16_SH042	54.83	89.17	0.614893	0.10262	0.01763	0.01553	0.00062	0.232381	99.3	3.93	99.2	16.24	96	371.36	99.3	3.93
		McKinlay-16_SH083	102.67	233.31	0.440058	0.10473	0.00678	0.01576	0.00027	0.264636	100.8	1.71	101.1	6.23	108.7	151.66	100.8	1.71
		McKinlay-16_SH006	316.89	328.49	0.964687	0.10478	0.00484	0.01583	0.00021	0.287191	101.2	1.34	101.2	4.45	99.1	109.71	101.2	1.34
		McKinlay-16_SH080	259.49	283.91	0.913987	0.10532	0.00813	0.01589	0.00031	0.252731	101.6	1.97	101.7	7.47	103.1	177.99	101.6	1.97
		McKinlay-16_SH090	923.52	626.53	1.47402	0.10589	0.00502	0.01588	0.00022	0.292229	101.6	1.37	102.2	4.61	116.6	113.53	101.6	1.37
		McKinlay-16_SH079	240.98	302.36	0.796997	0.10946	0.00999	0.01596	0.00038	0.26088	102.1	2.4	105.5	9.14	183.2	205.33	102.1	2.4
		McKinlay-16_SH008	78.29	79.31	0.987139	0.10801	0.0183	0.01612	0.00062	0.227007	103.1	3.96	104.1	16.77	129.2	362.76	103.1	3.96
		McKinlay-16_SH003	93.8	172.43	0.543989	0.10777	0.00576	0.01618	0.00023	0.265965	103.5	1.49	103.9	5.28	115	124.52	103.5	1.49
		McKinlay-16_SH026	190.53	224.01	0.850542	0.10815	0.00706	0.01633	0.00028	0.26266	104.4	1.74	104.3	6.47	101.5	151.24	104.4	1.74
		McKinlay-16_SH021	111.01	232.02	0.47845	0.11229	0.00917	0.01688	0.00035	0.253903	107.9	2.23	108.1	8.37	112.2	186.28	107.9	2.23
		McKinlay-16_SH004	54.3	126.88	0.427963	0.11425	0.00849	0.01692	0.00032	0.254506	108.2	2.01	109.8	7.73	147.9	169.05	108.2	2.01
		McKinlay-16_SH016	128.99	179.63	0.718087	0.11771	0.01405	0.01748	0.0005	0.239643	111.7	3.16	113	12.77	142.8	263.98	111.7	3.16
		McKinlay-16_SH022	98.7	319.14	0.309269	0.12022	0.0132	0.01765	0.00049	0.252845	112.8	3.1	115.3	11.96	167.6	242.85	112.8	3.1
		McKinlay-16_SH054	167.89	189.93	0.883957	0.11956	0.01403	0.01797	0.00052	0.246595	114.8	3.26	114.7	12.72	112.2	262.19	114.8	3.26
		McKinlay-16_SH017	136.09	261.24	0.520939	0.13195	0.01027	0.01929	0.0004	0.26642	123.2	2.51	125.8	9.21	177	175.79	123.2	2.51
		McKinlay-16_SH073	142.94	175.26	0.815588	0.13992	0.01033	0.02084	0.0004	0.259981	133	2.54	133	9.2	132.7	169.9	133	2.54
		McKinlay-16_SH038	407.37	669.16	0.608778	0.14181	0.00577	0.0211	0.00027	0.314494	134.6	1.7	134.7	5.13	136	95.84	134.6	1.7
		McKinlay-16_SH010	102.83	222.82	0.461494	0.14369	0.01315	0.02146	0.0005	0.25459	136.9	3.15	136.3	11.67	128.7	205.66	136.9	3.15
		McKinlay-16_SH001	335.76	1254.04	0.267743	0.16592	0.00641	0.02439	0.0003	0.318383	155.3	1.9	155.9	5.58	164.8	90.06	155.3	1.9
		McKinlay-16_SH076	83.41	190.85	0.437045	0.16499	0.00785	0.0244	0.00033	0.284258	155.4	2.08	155.1	6.84	150.1	112	155.4	2.08
		McKinlay-16_SH032	476.92	680.29	0.701054	0.19269	0.00772	0.02803	0.00036	0.320569	178.2	2.26	178.9	6.57	189	93.35	178.2	2.26
		McKinlay-16_SH061	84.74	251.42	0.337046	0.19606	0.01554	0.02865	0.0006	0.264219	182.1	3.75	181.8	13.19	179.1	180.35	182.1	3.75
		McKinlay-16_SH035	71.58	110.74	0.646379	0.19962	0.02091	0.02905	0.00076	0.249757	184.6	4.78	184.8	17.7	189.1	232.37	184.6	4.78
		McKinlay-16_SH005	109.31	171.66	0.636782	0.20639	0.01364	0.02993	0.00054	0.272999	190.1	3.36	190.5	11.48	196.6	149.58	190.1	3.36
		McKinlay-16_SH018	210.15	302.74	0.69416	0.23119	0.01239	0.03082	0.00048	0.290607	195.7	3.03	211.2	10.22	388.8	118.36	195.7	3.03
		McKinlay-16_SH034	463.06	501.64	0.923092	0.21271	0.01316	0.03088	0.00053	0.277415	196.1	3.32	195.8	11.02	193.5	141.56	196.1	3.32
		McKinlay-16_SH088	233.55	340.39	0.686125	0.21471	0.01356	0.03129	0.00055	0.278323	198.6	3.42	197.5	11.33	183.7	147.22	198.6	3.42
		McKinlay-16_SH015	113.69	233.11	0.48771	0.22436	0.01345	0.0315	0.00052	0.27537	199.9	3.28	205.5	11.15	271.3	134.95	199.9	3.28
		McKinlay-16_SH027	87.87	187.13	0.469567	0.22292	0.01455	0.03225	0.00057	0.270789	204.6	3.57	204.3	12.08	201.7	148.31	204.6	3.57
		McKinlay-16_SH091	236.83	309.6	0.764955	0.24758	0.01762	0.03435	0.00067	0.274068	217.7	4.18	224.6	14.34	299.4	159.76	217.7	4.18
		McKinlay-16_SH031	459.18	458.73	1.00098	0.25134	0.01017	0.03585	0.00046	0.31711	227.1	2.87	227.7	8.25	234.5	93.49	227.1	2.87
		McKinlay-16_SH070	265.76	345.3	0.76965	0.2708	0.01755	0.03909	0.0007	0.276315	247.2	4.33	243.3	14.02	206.8	148.33	247.2	4.33
		McKinlay-16_SH012	327.64	501.61	0.653177	0.28005	0.01784	0.03953	0.00071	0.28195	249.9	4.38	250.7	14.15	258.7	142.9	249.9	4.38
		McKinlay-16_SH051	156.48	345.12	0.453408	0.31713	0.02175	0.04309	0.00082	0.27747	271.9	5.05	279.7	16.76	345.5	151.84	271.9	5.05
		McKinlay-16_SH046	172.68	255.54	0.675745	0.38874	0.03345	0.05153	0.00119	0.26838	323.9	7.27	333.4	24.46	401.1	186.83	323.9	7.27
		McKinlay-16_SH052	150.66	184.53	0.816453	0.46352	0.02908	0.05999	0.00106	0.281644	375.6	6.43	386.7	20.18	453.8	137.8	375.6	6.43
		McKinlay-16_SH011	117.51	490.92	0.239367	0.48257	0.0188	0.06419	0.00081	0.323907	401	4.91	399.8	12.87	393.7	86.57	401	4.91
		McKinlay-16_SH057	110.06	201.03	0.54748	0.53567	0.0405	0.07151	0.00149	0.275589	445.3	8.99	435.6	26.78	385.9	166.02	445.3	8.99
		McKinlay-16_SH007	122.4	203.34	0.601947	0.59561	0.03931	0.0765	0.00142	0.281246	475.2	8.53	474.4	25.02	471	142.74	475.2	8.53
		McKinlay-16_SH071	66.85	305.98	0.218478	0.67661	0.02573	0.08351	0.00101	0.31804	517	6.01	524.7	15.58	558.5	84.65	517	6.01
		McKinlay-16_SH089	26.95	283.77	0.0949713	0.68452	0.02055	0.08372	0.00091	0.362065	518.3	5.39	529.5	12.38	578.3	67.6	518.3	5.39
		McKinlay-16_SH075	156.47	386.15	0.405205	0.68334	0.05815	0.08542	0.00196	0.26964	528.4	11.66	528.8	35.07	530.3	182.76	528.4	11.66
		McKinlay-16_SH028	73.61	124.58	0.590865	0.7047	0.06364	0.0859	0.00211	0.271997	531.3	12.51	541.6	37.9	585.9	188.85	531.3	12.51
		McKinlay-16_SH049	42.2	208	0.202885	0.80643	0.04834	0.09591	0.00164	0.285259	590.4	9.65	600.4	27.17	639.4	128.18	590.4	9.65
		McKinlay-16_SH067	50.69	556.32	0.0911166	0.79719	0.03099	0.09707	0.00118	0.312707	597.2	6.94	595.2	17.51	587.9	86.23	597.2	6.94
		McKinlay-16_SH053	185.19	105.88	1.74906	0.8203	0.03072	0.09819	0.00124	0.337214	603.8	7.25	608.2	17.14	625.2	81.54	603.8	7.25
		McKinlay-16_SH044	262.24	290.6	0.902409	0.81811	0.02075	0.09855	0.00099	0.39607	605.9	5.79	607	11.59	611.5	56.66	605.9	5.79
		McKinlay-16_SH040	115.51	236.76	0.487878	4.24188	0.17739	0.26624	0.00367	0.329626	1521.7	18.7	1682.2	34.36	1889	75.57	1889	75.57
								Legend
				Mesozoic dated grains
				Paleozoic dated grains
				All grains older then 1Ga
			Notes:
			*Age is calculated by error propagation and included errors
			*U and U/Th concentrations are calculated against NIST 612 and are within ~20% error
			*Spot size: 32µm
			*Energy levels at 6 J/cm2 at 193 nm
			*All grains older then 1000 Ma, preferred ages are based on Pb207/Pb206
			*Grains younger then 350 Ma (based on Pb206/U238), which exhibited greater then ≥ 30% discordance
			or high common lead (Pb2006/Pb204 <1000) were excluded
			*Grains older then 350 Ma (based on Pb206/U238), which exhibited greater then ≥ 15% discordance
			or high common lead (Pb2006/Pb204 <1000) were excluded
			*1 Age correction completed by Isoplot (AGE7Corr)

## Sheet: 1C
		U-Pb LA-ICPMS detrital zircon data
		Sample Location: Lark Quarry Conservation Park (Sample Name: Hades Hill), southwest of Winton, Queensland
		Formation: Upper Winton Formation
		Samples Description: Fine-grained sandstone; collected in a plant filled abandoned channel
		Sample #	Th	U	Th/U	Pb207	±	Pb206	±	Error	Pb206	± 1σ	Pb207	± 1σ	Pb207	± 1σ	Preferred	± 1σ
		Hades Hill	(In PPM)	(In PPM)		/U235	1σ	/U238	1σ	Corr.	/U238 *1	(Ma)	/U235	(Ma)	/Pb206	(Ma)	Age	(Ma)
		HadesHill_43	70.51	272.93	0.258345	0.0949	0.00637	0.01439	0.00025	0.258825	92.1	1.59	92.1	5.91	91.6	156.46	92.1	1.59
		HadesHill_33	431.11	1575.61	0.273615	0.09695	0.00294	0.01468	0.00016	0.359414	94	1.02	94	2.73	93.2	73.82	94	1.02
		HadesHill_46	23.78	51.04	0.465909	0.09914	0.01686	0.01492	0.00056	0.220704	95.5	3.53	96	15.58	111.5	365.03	95.5	3.53
		HadesHill_30	40.5	110.92	0.365128	0.10017	0.00897	0.01494	0.00033	0.246666	95.6	2.09	96.9	8.28	132.8	202.41	95.6	2.09
		HadesHill_34	67.06	150.63	0.445197	0.09948	0.0044	0.01505	0.00019	0.28543	96.3	1.2	96.3	4.07	96.7	105.36	96.3	1.2
		HadesHill_11	43.91	84.58	0.519153	0.10601	0.00998	0.016	0.00037	0.245639	102.3	2.33	102.3	9.16	104	213.27	102.3	2.33
		HadesHill_10	62.41	83.5	0.747425	0.10682	0.00941	0.01608	0.00034	0.240025	102.9	2.17	103.1	8.64	110.3	199.96	102.9	2.17
		HadesHill_5	76.49	108.66	0.703939	0.10756	0.01088	0.01618	0.00037	0.226071	103.5	2.34	103.7	9.97	109.2	227.52	103.5	2.34
		HadesHill_52	31.95	94.72	0.33731	0.10754	0.00519	0.01619	0.00022	0.281565	103.6	1.4	103.7	4.76	109.2	112.73	103.6	1.4
		HadesHill_32	159.67	291.09	0.548525	0.10805	0.00645	0.01628	0.00026	0.267537	104.1	1.64	104.2	5.91	105.3	138.85	104.1	1.64
		HadesHill_15	62.39	106.78	0.584285	0.11242	0.00713	0.01672	0.00026	0.245183	106.9	1.67	108.2	6.51	138.5	146.03	106.9	1.67
		HadesHill_60	49.46	176.52	0.280195	0.11092	0.00887	0.01673	0.00034	0.254138	106.9	2.17	106.8	8.11	107.2	182.69	106.9	2.17
		HadesHill_53	32.79	192.4	0.170426	0.11424	0.01072	0.01696	0.00039	0.245054	108.4	2.44	109.8	9.77	143.1	211.09	108.4	2.44
		HadesHill_59	424.08	501.24	0.846062	0.11519	0.00226	0.01732	0.00017	0.500273	110.7	1.09	110.7	2.06	113.4	47.42	110.7	1.09
		HadesHill_69	114.78	187.01	0.613764	0.11738	0.00601	0.01769	0.00025	0.276014	113	1.61	112.7	5.46	107.2	119.53	113	1.61
		HadesHill_61	52.61	87.79	0.599271	0.11819	0.02379	0.01782	0.00065	0.181214	113.9	4.13	113.4	21.6	107.1	422.08	113.9	4.13
		HadesHill_65	251.23	561.39	0.447514	0.11941	0.00356	0.01783	0.00019	0.357432	114	1.22	114.5	3.23	126.9	71.06	114	1.22
		HadesHill_64	208.4	350.65	0.594325	0.12686	0.00508	0.01883	0.00024	0.318289	120.3	1.5	121.3	4.58	141.7	94.02	120.3	1.5
		HadesHill_58	77.63	115.39	0.672762	0.13221	0.01389	0.01948	0.00049	0.239425	124.4	3.11	126.1	12.46	159.2	234.25	124.4	3.11
		HadesHill_18	168.61	227.59	0.74085	0.14968	0.01134	0.02171	0.00043	0.261432	138.4	2.69	141.6	10.02	197.6	171.3	138.4	2.69
		HadesHill_29	415.89	263.36	1.57917	0.20401	0.00755	0.02962	0.00037	0.337537	188.2	2.35	188.5	6.36	195.4	85.91	188.2	2.35
		HadesHill_54	97.62	398.36	0.245055	0.20665	0.00433	0.03003	0.00031	0.492667	190.8	1.94	190.7	3.64	192.8	49.58	190.8	1.94
		HadesHill_9	224.25	317.37	0.706589	0.21638	0.0079	0.03096	0.00039	0.345027	196.6	2.45	198.9	6.59	228.9	84.34	196.6	2.45
		HadesHill_63	97.27	250.96	0.387592	0.21672	0.00967	0.03129	0.00044	0.315152	198.6	2.75	199.2	8.07	208	102.74	198.6	2.75
		HadesHill_25	79.09	145.88	0.542158	0.22801	0.00932	0.03271	0.00041	0.306649	207.5	2.59	208.6	7.7	221.9	94.56	207.5	2.59
		HadesHill_68	285.2	277.39	1.02816	0.23543	0.00622	0.03323	0.00034	0.387275	210.7	2.15	214.7	5.11	258.9	61.9	210.7	2.15
		HadesHill_71	155.19	176.13	0.881111	0.23196	0.00673	0.03332	0.00037	0.382732	211.3	2.28	211.8	5.55	219.2	68.02	211.3	2.28
		HadesHill_35	279.51	351.42	0.795373	0.26271	0.00535	0.0375	0.00038	0.497594	237.3	2.39	236.8	4.3	234.4	47.9	237.3	2.39
		HadesHill_44	163.72	316.91	0.516614	0.28094	0.00587	0.03906	0.00041	0.502374	247	2.55	251.4	4.66	295.3	48.4	247	2.55
		HadesHill_27	35.53	48.71	0.729419	0.37203	0.01567	0.05112	0.00068	0.315811	321.4	4.19	321.2	11.59	320.7	95.44	321.4	4.19
		HadesHill_1	110.01	274.62	0.40059	0.39875	0.00647	0.05421	0.0005	0.568443	340.3	3.08	340.7	4.69	345.2	38.39	340.3	3.08
		HadesHill_72	88.52	130.28	0.67946	0.4067	0.01087	0.05538	0.0006	0.405362	347.5	3.67	346.5	7.85	341.1	61.48	347.5	3.67
		HadesHill_76	116.86	226.42	0.51612	0.41806	0.00879	0.05654	0.00055	0.462654	354.5	3.38	354.7	6.29	356.5	49.05	354.5	3.38
		HadesHill_3	36.03	47.49	0.758686	0.5057	0.01645	0.06648	0.00078	0.360687	414.9	4.74	415.6	11.09	420.4	72.74	414.9	4.74
		HadesHill_70	114.31	152.42	0.749967	0.70502	0.01635	0.08812	0.00097	0.474658	544.4	5.72	541.8	9.74	532.5	52	544.4	5.72
		HadesHill_6	156.7	67.35	2.32665	0.80022	0.0208	0.09617	0.00108	0.432046	591.9	6.35	596.9	11.73	617.7	57.02	591.9	6.35
		HadesHill_14	137.03	164.63	0.832351	0.8125	0.0159	0.0987	0.00102	0.528092	606.8	5.98	603.9	8.91	594.3	43.59	606.8	5.98
		HadesHill_8	121.06	205.3	0.589674	0.92467	0.01362	0.10972	0.00102	0.631138	671.1	5.95	664.8	7.18	644.7	33.38	671.1	5.95
		HadesHill_51	68.52	133.28	0.514106	9.37707	0.13554	0.43363	0.0047	0.749857	2322.1	21.14	2375.6	13.26	2423.8	24.83	2423.8	24.83
		HadesHill_47	122.98	105.14	1.16968	12.176	0.11783	0.47621	0.00433	0.939589	2510.7	18.91	2618.1	9.08	2703.4	17.63	2703.4	17.63
									Legend
					Mesozoic dated grains
					Paleozoic dated grains
					All grains older then 1Ga
				Notes:
				*Age is calculated by error propagation and included errors
				*U and U/Th concentrations are calculated against NIST 612 and are within ~20% error
				*Spot size: 32µm
				*Energy levels at 6 J/cm2 at 193 nm
				*All grains older then 1000 Ma, preferred ages are based on Pb207/Pb206
				*Grains younger then 350 Ma (based on Pb206/U238), which exhibited greater then ≥ 30% discordance
				or high common lead (Pb2006/Pb204 <1000) were excluded
				*Grains older then 350 Ma (based on Pb206/U238), which exhibited greater then ≥ 15% discordance
				or high common lead (Pb2006/Pb204 <1000) were excluded
				*1 Age correction completed by Isoplot (AGE7Corr)

## Sheet: 1D
		U-Pb LA-ICPMS detrital zircon data
		Sample Location: Lark Quarry Conservation Park (Sample Name: Eureka 1), southwest of Winton, Queensland
		Formation: Upper Winton Formation
		Samples Description: Fine-grained sandstone; collected 0-1 m above the dinosaur trackway surface
		Tucker et al., 2013
		Sample #	Th	U	Th/U	Pb207	±	Pb206	±	Error	Pb206	± 1σ	Pb207	± 1σ	Pb207	± 1σ	Preferred	± 1σ
		ERU	(In PPM)	(In PPM)		/U235	1σ	/U238	1σ	Corr.	/U238 *1	(Ma)	/U235	(Ma)	/Pb206	(Ma)	Age	(Ma)
		ERU-49	217.2	459.8	0.472379	0.10708	0.00483	0.01446	0.00019	0.291304	92.5	1.23	591.8	4.43	358.4	101.24	92.5	1.23
		ERU-32	77.18	225.53	0.342216	0.10925	0.00492	0.01477	0.0002	0.300681	94.5	1.29	105.3	4.5	356.5	101.27	94.5	1.29
		ERU-33	191.75	289.65	0.662006	0.10884	0.00479	0.01511	0.0002	0.300759	96.7	1.28	104.9	4.39	295.4	100.48	96.7	1.28
		ERU-11	234.58	346.06	0.677859	0.10925	0.005	0.01524	0.00021	0.301083	97.5	1.36	105.3	4.58	285.1	104.66	97.5	1.36
		ERU-45	161.71	194.69	0.830602	0.13591	0.00569	0.01525	0.00021	0.328919	97.5	1.32	129.4	5.08	762.8	88.67	97.5	1.32
		ERU-29	284.08	376.27	0.75499	0.10661	0.00329	0.01529	0.00017	0.360283	97.8	1.06	102.9	3.02	220.7	72.56	97.8	1.06
		ERU-34	461.1	445.88	1.03413	0.10587	0.0028	0.01529	0.00016	0.395665	97.8	1.01	102.2	2.58	205.3	62.85	97.8	1.01
		ERU-15	99.66	88.48	1.12636	0.10154	0.00935	0.0153	0.00034	0.241331	97.9	2.16	98.2	8.62	106.8	209.1	97.9	2.16
		ERU-23	391.8	723.1	0.541834	0.10351	0.00279	0.01539	0.00016	0.385709	98.4	1.05	100	2.57	137.9	64.55	98.4	1.05
		ERU-10	65.29	74.87	0.872045	0.11765	0.00681	0.01547	0.00025	0.279187	99	1.57	112.9	6.18	418.8	128.03	99	1.57
		ERU-48	295.16	461.51	0.639553	0.10326	0.00544	0.01552	0.00022	0.269069	99.3	1.41	124.5	5.01	111.1	123.53	99.3	1.41
		ERU-57	156.97	394.26	0.398138	0.11225	0.00397	0.01559	0.00019	0.344591	99.7	1.18	129.4	3.63	294.5	81.07	99.7	1.18
		ERU-67	497.48	763.85	0.65128	0.10601	0.00557	0.01567	0.00024	0.291497	100.2	1.53	102.3	5.11	151.5	121.11	100.2	1.53
		ERU-74	221.59	218.58	1.01377	0.11045	0.00604	0.01568	0.00024	0.279894	100.3	1.5	106.4	5.52	243.2	124.1	100.3	1.5
		ERU-6	59.06	185.51	0.318366	0.10504	0.00494	0.01575	0.00021	0.283509	100.7	1.35	101.4	4.54	117.3	110.47	100.7	1.35
		ERU-12	255.23	316.62	0.806108	0.10401	0.00311	0.01578	0.00017	0.360294	100.9	1.07	100.5	2.86	88.3	73.07	100.9	1.07
		ERU-76	481.75	388.99	1.23846	0.11173	0.00663	0.01596	0.00025	0.263975	102.1	1.61	107.5	6.06	230	134.85	102.1	1.61
		ERU-75	171.23	297.97	0.574655	0.1388	0.00906	0.01608	0.0003	0.285823	102.8	1.89	132	8.08	694.5	136.76	102.8	1.89
		ERU-79	198.83	275.75	0.721052	0.11036	0.00781	0.01627	0.0003	0.260552	104.1	1.89	106.3	7.14	155.3	161.03	104.1	1.89
		ERU-80	417.99	484.03	0.863562	0.13933	0.00693	0.01656	0.00025	0.303523	105.9	1.61	132.4	6.18	639.4	106.04	105.9	1.61
		ERU-26	278.02	652.9	0.425823	0.11913	0.00322	0.01679	0.00018	0.396631	107.4	1.12	114.3	2.93	261	63.64	107.4	1.12
		ERU-60	149.41	221.9	0.673321	0.13055	0.00735	0.01692	0.00027	0.283435	108.1	1.72	124.6	6.6	449.9	123.91	108.1	1.72
		ERU-36	325.25	405.09	0.802908	0.13042	0.00607	0.01705	0.00025	0.315044	109	1.58	124.5	5.45	432.1	103.03	109	1.58
		ERU-46	555.19	802.29	0.692007	0.11722	0.00442	0.01715	0.00022	0.340203	109.6	1.37	112.6	4.02	175.2	88.13	109.6	1.37
		ERU-55	581.17	667.86	0.870197	0.11856	0.00348	0.01723	0.00018	0.355915	110.1	1.15	178.7	3.16	190.3	69.67	110.1	1.15
		ERU-65	1369.12	1527.19	0.896496	0.107	0.00584	0.01758	0.00026	0.270973	112.4	1.68	103.2	5.35	0.1	28.43	112.4	1.68
		ERU-38	203.28	213.81	0.950751	0.13977	0.00664	0.01803	0.00026	0.303545	115.2	1.62	132.8	5.92	460.6	105.87	115.2	1.62
		ERU-51	251.95	399.13	0.631248	0.15238	0.01073	0.01849	0.00036	0.276499	118.1	2.28	140.6	9.46	594.7	149.89	118.1	2.28
		ERU-20	256.74	263.43	0.974604	0.13018	0.00393	0.01853	0.0002	0.357525	118.3	1.24	124.3	3.53	239	71.11	118.3	1.24
		ERU-39	151.42	236.65	0.639848	0.14857	0.00607	0.01903	0.00024	0.308685	121.5	1.53	140.6	5.36	475.6	91.6	121.5	1.53
		ERU-9	210.12	272.41	0.771337	0.13419	0.00531	0.01907	0.00024	0.318043	121.8	1.54	127.9	4.75	242.5	91.63	121.8	1.54
		ERU-42	171.94	287.34	0.598385	0.1548	0.00614	0.01986	0.00026	0.330063	126.8	1.62	146.1	5.4	472.6	88.96	126.8	1.62
		ERU-21	151.43	180.25	0.840111	0.15314	0.00556	0.02132	0.00025	0.322973	136	1.57	144.7	4.9	289.6	83.81	136	1.57
		ERU-24	381.27	444.27	0.858194	0.14874	0.00647	0.02151	0.0003	0.32063	137.2	1.87	140.8	5.72	203	100.83	137.2	1.87
		ERU-77	117.24	219.79	0.533418	0.56611	0.05084	0.02196	0.00077	0.390439	140	4.87	455.5	32.96	2718.8	149.33	140	4.87
		ERU-81	679.21	850.93	0.798197	0.15743	0.0056	0.02196	0.00027	0.345645	140	1.7	148.5	4.91	283.2	81.11	140	1.7
		ERU-35	94.61	123.04	0.768937	0.17492	0.00864	0.02361	0.00034	0.291547	150.4	2.16	163.7	7.47	359.9	110.19	150.4	2.16
		ERU-56	61.32	117.59	0.521473	0.17546	0.02015	0.02466	0.00068	0.240115	157	4.31	215	17.4	268.2	249.09	157	4.31
		ERU-31	37.62	55.48	0.678082	0.22309	0.01282	0.02584	0.00043	0.28958	164.5	2.73	204.5	10.64	695.1	121.51	164.5	2.73
		ERU-4	167.27	219.31	0.76271	0.18623	0.00493	0.02669	0.00028	0.396289	169.8	1.73	173.4	4.22	223	62.79	169.8	1.73
		ERU-17	1063.27	723.44	1.46974	0.1905	0.00479	0.02674	0.00029	0.431316	170.1	1.81	177.1	4.08	270.5	58.86	170.1	1.81
		ERU-43	313.97	425.84	0.737296	0.19241	0.00691	0.02854	0.00035	0.341479	181.4	2.19	178.7	5.89	142.7	84.65	181.4	2.19
		ERU-47	104.4	171.68	0.608108	0.21713	0.01503	0.02881	0.00054	0.270777	183.1	3.38	199.5	12.54	399	151.98	183.1	3.38
		ERU-2	314.74	435.71	0.722361	0.19864	0.00442	0.02908	0.00028	0.432721	184.8	1.77	184	3.75	173.4	54.12	184.8	1.77
		ERU-16	71.38	499.44	0.14292	0.21351	0.00655	0.02992	0.00032	0.34863	190.1	2.01	196.5	5.48	274.6	71.98	190.1	2.01
		ERU-18	553.39	526.28	1.05151	0.22249	0.00529	0.03135	0.00032	0.429306	199	2.01	204	4.39	262.4	56.19	199	2.01
		ERU-68	2825.88	1833.63	1.54114	0.22542	0.00543	0.0317	0.00033	0.432163	201.2	2.07	206.4	4.5	265.3	56.12	201.2	2.07
		ERU-5	87	160.88	0.540776	0.23684	0.00876	0.03252	0.0004	0.332553	206.3	2.51	215.8	7.19	320.9	84.79	206.3	2.51
		ERU-54	220.17	280.24	0.785648	0.2273	0.00975	0.03267	0.00042	0.299706	207.2	2.65	146.1	8.07	215.1	99.3	207.2	2.65
		ERU-73	263.81	243.23	1.08461	0.65881	0.02303	0.03271	0.00046	0.402294	207.5	2.88	513.9	14.1	2299.4	61.75	207.5	2.88
		ERU-44	91.5	115.76	0.790428	0.23579	0.00746	0.03386	0.00037	0.345383	214.7	2.32	215	6.13	218	74.28	214.7	2.32
		ERU-1	238.14	375.57	0.634076	0.2646	0.00713	0.0367	0.0004	0.404477	232.3	2.5	238.4	5.73	298.3	62.87	232.3	2.5
		ERU-28	455.67	488.42	0.932947	0.28017	0.0075	0.03963	0.00043	0.405326	250.6	2.68	250.8	5.95	252.9	62.8	250.6	2.68
		ERU-63	125.12	388.1	0.322391	0.32173	0.01324	0.04443	0.00059	0.322685	280.2	3.62	283.2	10.17	306.7	93.45	280.2	3.62
		ERU-14	384.85	402.1	0.9571	0.3422	0.00929	0.04744	0.00051	0.395995	298.8	3.11	298.8	7.03	299.4	63.49	298.8	3.11
		ERU-30	104.19	244.08	0.426868	0.36078	0.0092	0.04936	0.00051	0.405182	310.6	3.14	312.8	6.87	329.3	59.44	310.6	3.14
		ERU-78	182.04	760.37	0.23941	0.68765	0.02652	0.08603	0.00109	0.328527	532	6.49	531.4	15.96	527.4	84.8	532	6.49
		ERU-13	135.17	335.66	0.402699	0.69666	0.01787	0.08618	0.00091	0.411653	532.9	5.37	536.8	10.69	553.4	57.92	532.9	5.37
		ERU-3	94.56	209.94	0.450414	0.71192	0.0144	0.08675	0.00086	0.490115	536.3	5.08	545.9	8.54	586.5	45.88	536.3	5.08
		ERU-25	72.37	192.78	0.375402	0.68483	0.02075	0.08709	0.001	0.378963	538.3	5.9	529.7	12.51	492.3	68.72	538.3	5.9
		ERU-7	170.24	364.99	0.466424	0.73523	0.01802	0.0894	0.00096	0.438129	552	5.7	559.6	10.55	590.6	54.88	552	5.7
		ERU-64	125.83	162.04	0.776537	0.74153	0.03029	0.09064	0.00123	0.332212	559.3	7.24	563.3	17.66	578.6	88.48	559.3	7.24
		ERU-41	81.02	309.52	0.26176	0.75985	0.01839	0.09129	0.00097	0.43903	563.2	5.73	573.9	10.61	616.4	53.53	563.2	5.73
		ERU-59	31.79	1653.17	0.0192297	0.74749	0.01732	0.09178	0.00098	0.460824	566	5.8	199.5	10.06	569.3	51.24	566	5.8
		ERU-8	46.38	569.37	0.0814585	0.77031	0.02264	0.09267	0.00106	0.389185	571.3	6.26	579.9	12.99	614.3	65.45	571.3	6.26
		ERU-58	219.19	264.54	0.82857	0.78834	0.01958	0.09436	0.00102	0.435224	581.3	5.99	112.6	11.12	624.3	54.53	581.3	5.99
		ERU-37	190.51	1672.29	0.113922	0.79111	0.01511	0.09578	0.00092	0.502904	589.6	5.39	591.8	8.56	599.8	43.29	589.6	5.39
		ERU-72	410.62	1275.32	0.321974	0.80467	0.02138	0.09664	0.00102	0.39724	594.7	5.98	599.5	12.03	616.8	58.39	594.7	5.98
		ERU-40	138.88	353.41	0.392971	1.03807	0.01924	0.11799	0.00112	0.512147	719	6.47	723	9.58	735.2	41.16	719	6.47
		ERU-69	822.72	1909	0.430969	1.7184	0.05766	0.16348	0.00204	0.371891	976.1	11.29	1015.4	21.54	1100.1	67.03	976.1	11.29
		ERU-19	169.18	270.18	0.626175	1.80783	0.03229	0.17604	0.00168	0.534303	1045.3	9.22	1048.3	11.68	1054.3	38.29	1054.3	38.29
		ERU-71	239.65	516.71	0.4638	1.93521	0.05332	0.18502	0.0021	0.411944	1094.4	11.44	1093.3	18.45	1090	55.57	1090	55.57
		ERU-53	515.68	716.07	0.720153	2.11111	0.05727	0.18926	0.00215	0.418758	1117.4	11.65	573.9	18.69	1218.7	54.04	1218.7	54.04
		ERU-22	135.57	277.29	0.488911	3.1287	0.06007	0.25179	0.0025	0.51714	1447.7	12.89	1439.8	14.77	1428.1	38.33	1428.1	38.33
								Legend
				Mesozoic dated grains
				Paleozoic dated grains
				All Grains older then 1Ga
			Notes:
			*Age is calculated by error propagation and included errors
			*U and U/Th concentrations are calculated against NIST 612 and are within ~20% error
			*Spot size: 32µm
			*Energy levels at 6 J/cm2 at 193 nm
			*All grains older then 1000 Ma, preferred ages are based on Pb207/Pb206
			*Grains younger then 350 Ma (based on Pb206/U238), which exhibited greater then ≥ 30% discordance
			or high common lead (Pb2006/Pb204 <1000) were excluded
			*Grains older then 350 Ma (based on Pb206/U238), which exhibited greater then ≥ 15% discordance
			or high common lead (Pb2006/Pb204 <1000) were excluded
			*1 Age correction completed by Isoplot (AGE7Corr)

## Sheet: 1E
		U-Pb LA-ICPMS detrital zircon data
		Sample Location: Bladensburg National Park (Sample Name: BBD4), near Winton, Queensland
		Formation: Upper Winton Formation
		Samples Description: Fine- to medium-grained sandstone; collected just above (1-2m) a fossil bearing horizon
		Tucker et al., 2013
		Sample #	Th	U	Th/U	Pb207	±	Pb206	±	Error	Pb206	± 1σ	Pb207	± 1σ	Pb207	± 1σ	Preferred	± 1σ
		BBD4	(In PPM)	(In PPM)		/U235	1σ	/U238	1σ	Corr.	/U238 *1	(Ma)	/U235	(Ma)	/Pb206	(Ma)	Age	(Ma)
		BBD4-73	2.81	6.91	0.406657	0.09694	0.00387	0.01459	0.00019	0.326205	93.3	1.21	93.9	3.58	109.5	92.99	93.3	1.21
		BBD4-74	4.62	7.31	0.632011	0.09892	0.00299	0.01464	0.00017	0.384168	93.7	1.05	95.8	2.77	148.6	70.86	93.7	1.05
		BBD4-75	4.01	5.9	0.679661	0.10162	0.00489	0.01494	0.00022	0.306015	95.6	1.37	98.3	4.51	164.2	110.42	95.6	1.37
		BBD4-76	3.16	4.21	0.750594	0.10014	0.00488	0.01501	0.00021	0.287095	96	1.32	96.9	4.51	119.4	113	96	1.32
		BBD4-19	3.75	7.06	0.531161	0.10267	0.00382	0.01529	0.00018	0.316406	97.8	1.17	99.2	3.52	132.8	87.48	97.8	1.17
		BBD4-34	4.68	7.19	0.650904	0.09906	0.00369	0.01548	0.00018	0.312157	99	1.16	95.9	3.41	18.7	89.48	99	1.16
		BBD4-2	3.62	17.13	0.211325	0.10342	0.00189	0.01549	0.00014	0.49456	99.1	0.91	99.9	1.74	120.4	45.16	99.1	0.91
		BBD4-1	3.79	4.95	0.765657	0.10301	0.00434	0.01553	0.00019	0.290383	99.3	1.21	99.5	3.99	104.5	99.41	99.3	1.21
		BBD4-63	3.34	6.25	0.5344	0.11083	0.00299	0.01563	0.00017	0.403159	100	1.05	106.7	2.74	260.2	62.63	100	1.05
		BBD4-7	11.23	9.56	1.17469	0.10976	0.00374	0.0157	0.00018	0.336469	100.4	1.17	105.7	3.42	227.5	79.28	100.4	1.17
		BBD4-71	3.97	7.38	0.53794	0.11211	0.00451	0.01571	0.0002	0.316462	100.5	1.25	107.9	4.11	276	91.25	100.5	1.25
		BBD4-20	2.1	4.93	0.425963	0.11837	0.00459	0.01579	0.0002	0.326646	101	1.27	113.6	4.17	386.1	86.48	101	1.27
		BBD4-6	4.84	4.96	0.975806	0.10754	0.00371	0.0159	0.00018	0.328149	101.7	1.11	103.7	3.4	151.4	81.54	101.7	1.11
		BBD4-68	1.59	3.58	0.444134	0.10968	0.00412	0.01604	0.00019	0.31534	102.6	1.18	105.7	3.77	177.3	87.37	102.6	1.18
		BBD4-39	3.91	5.6	0.698214	0.10652	0.00325	0.01608	0.00018	0.366889	102.8	1.12	102.8	2.98	102.8	72.54	102.8	1.12
		BBD4-5	2.52	4.73	0.53277	0.11242	0.00644	0.01609	0.00025	0.271232	102.9	1.6	108.2	5.88	227.1	130.32	102.9	1.6
		BBD4-30	6.03	9.36	0.644231	0.10768	0.00317	0.01626	0.00017	0.355144	104	1.1	103.8	2.91	102.1	70.54	104	1.1
		BBD4-78	1.99	3.55	0.560563	0.1187	0.00418	0.01626	0.0002	0.349288	104	1.25	113.9	3.79	327	79.49	104	1.25
		BBD4-44	1.67	2.41	0.692946	0.1129	0.00733	0.01632	0.00026	0.245382	104.4	1.67	108.6	6.68	204.5	147.04	104.4	1.67
		BBD4-36	7.92	8.54	0.9274	0.11031	0.00406	0.01643	0.0002	0.330736	105.1	1.26	106.3	3.72	132.8	86.54	105.1	1.26
		BBD4-43	4.8	5.69	0.843585	0.11158	0.0044	0.0165	0.0002	0.307383	105.5	1.3	107.4	4.02	150.9	92.08	105.5	1.3
		BBD4-55	1.58	3.37	0.468843	0.12072	0.00564	0.01655	0.00022	0.284528	105.8	1.37	115.7	5.11	326.8	105.13	105.8	1.37
		BBD4-90	1.88	3.03	0.620462	0.11848	0.00624	0.0166	0.00025	0.285951	106.1	1.61	113.7	5.66	275.7	118.03	106.1	1.61
		BBD4-48	6.68	10.87	0.614535	0.11471	0.0034	0.01666	0.00019	0.38477	106.5	1.19	110.3	3.1	191.3	69.21	106.5	1.19
		BBD4-10	1.19	2.35	0.506383	0.11272	0.00569	0.0169	0.00023	0.269606	108.1	1.44	108.5	5.19	116.9	117.41	108.1	1.44
		BBD4-40	2.21	3.51	0.62963	0.11248	0.00798	0.01695	0.0003	0.249473	108.3	1.92	108.2	7.29	105.7	162.79	108.3	1.92
		BBD4-79	2.53	3.84	0.658854	0.11319	0.00619	0.01696	0.00026	0.280327	108.4	1.66	108.9	5.65	119.2	126.19	108.4	1.66
		BBD4-23	1.93	2.29	0.842795	0.15521	0.00873	0.01721	0.00029	0.299587	110	1.82	146.5	7.68	788.4	117.1	110	1.82
		BBD4-27	0.85	1.31	0.648855	0.12313	0.00914	0.01788	0.0003	0.226033	114.3	1.87	117.9	8.26	194.2	167.24	114.3	1.87
		BBD4-45	0.74	1.6	0.4625	0.13611	0.00653	0.01789	0.00024	0.279626	114.3	1.52	129.6	5.84	420.3	105.97	114.3	1.52
		BBD4-18	2.26	5.3	0.426415	0.27346	0.01617	0.01798	0.00038	0.357419	114.9	2.41	245.5	12.89	1805.6	108.53	114.9	2.41
		BBD4-12	2.87	5.2	0.551923	0.12917	0.00439	0.01886	0.00021	0.327623	120.5	1.34	123.4	3.95	179.9	79.88	120.5	1.34
		BBD4-84	12.98	15.13	0.857898	0.13122	0.00293	0.01973	0.00021	0.476677	126	1.31	125.2	2.63	111.2	52.46	126	1.31
		BBD4-15	4.48	8.86	0.505643	0.13827	0.00347	0.02088	0.00021	0.400763	133.2	1.36	131.5	3.09	100.8	60.42	133.2	1.36
		BBD4-16	4.6	6.91	0.665702	0.14786	0.00336	0.02179	0.00022	0.444301	139	1.37	140	2.97	158.7	54.42	139	1.37
		BBD4-59	0.64	1.12	0.571429	0.17577	0.0133	0.02336	0.00044	0.248928	148.8	2.78	164.4	11.48	395.1	164.72	148.8	2.78
		BBD4-32	3.73	4.91	0.759674	0.18502	0.00588	0.02657	0.0003	0.35528	169	1.85	172.4	5.04	219.2	74.29	169	1.85
		BBD4-51	17.41	42.11	0.413441	0.20367	0.00292	0.02843	0.00026	0.637883	180.7	1.61	188.2	2.46	284.6	34.61	180.7	1.61
		BBD4-17	2.17	6.65	0.326316	0.20616	0.00554	0.02849	0.00031	0.404915	181.1	1.94	190.3	4.66	306.5	61.93	181.1	1.94
		BBD4-26	1.66	1.96	0.846939	0.20657	0.00887	0.02994	0.00039	0.303359	190.2	2.44	190.7	7.46	196.4	99.2	190.2	2.44
		BBD4-3	36.48	35.81	1.01871	0.21007	0.00307	0.03024	0.00028	0.633581	192.1	1.75	193.6	2.57	212.4	35.92	192.1	1.75
		BBD4-28	8.73	12.26	0.712072	0.23318	0.0065	0.03036	0.00035	0.413565	192.8	2.17	212.8	5.35	440	62.34	192.8	2.17
		BBD4-8	4.19	5.72	0.732517	0.2417	0.00955	0.03112	0.00041	0.33344	197.6	2.54	219.8	7.81	464.3	88.53	197.6	2.54
		BBD4-38	6.5	8.83	0.736127	0.21995	0.00668	0.03199	0.00035	0.360248	203	2.21	201.9	5.56	188.7	71.24	203	2.21
		BBD4-64	2.73	8.73	0.312715	0.22645	0.00683	0.03297	0.00039	0.392191	209.1	2.41	207.3	5.66	186.1	69.74	209.1	2.41
		BBD4-58	2.77	4.92	0.563008	0.22939	0.00738	0.0331	0.00039	0.366231	209.9	2.42	209.7	6.09	207.1	74.49	209.9	2.42
		BBD4-24	4.62	8.88	0.52027	0.23332	0.00797	0.03318	0.00037	0.326452	210.4	2.33	212.9	6.56	243.8	79.65	210.4	2.33
		BBD4-53	1.45	2.95	0.491525	0.24816	0.00749	0.03491	0.00039	0.370139	221.2	2.44	225.1	6.09	266.6	69.58	221.2	2.44
		BBD4-25	3.75	4.74	0.791139	0.24675	0.01108	0.03528	0.00045	0.284054	223.5	2.83	223.9	9.02	231.1	103.53	223.5	2.83
		BBD4-77	12.8	15.92	0.80402	0.2524	0.00524	0.03606	0.00038	0.507593	228.4	2.36	228.5	4.25	230.5	47.61	228.4	2.36
		BBD4-70	3.84	11.13	0.345013	0.26382	0.00522	0.03809	0.0004	0.530745	241	2.46	237.7	4.2	206.6	45.98	241	2.46
		BBD4-29	0.25	0.67	0.373134	0.26865	0.02269	0.03855	0.00077	0.236493	243.9	4.76	241.6	18.16	219.1	188.1	243.9	4.76
		BBD4-4	11.26	12.1	0.930579	0.27822	0.00584	0.03883	0.00039	0.47849	245.5	2.45	249.2	4.64	284.3	49.36	245.5	2.45
		BBD4-89	11.8	17.95	0.657382	0.28874	0.00532	0.04117	0.00042	0.553686	260.1	2.61	257.6	4.19	235.1	42.1	260.1	2.61
		BBD4-33	8.63	11.21	0.769848	0.29337	0.0058	0.04133	0.0004	0.489533	261.1	2.5	261.2	4.56	262.9	46.81	261.1	2.5
		BBD4-22	3.32	7.33	0.452933	0.32463	0.00614	0.04466	0.00042	0.497223	281.7	2.58	285.5	4.7	317.6	44.87	281.7	2.58
		BBD4-42	2.62	5.96	0.439597	0.40183	0.00707	0.05398	0.00053	0.558041	338.9	3.22	343	5.12	371.2	40.95	338.9	3.22
		BBD4-52	2.7	5.16	0.523256	0.4182	0.01214	0.05765	0.00063	0.376449	361.3	3.87	354.8	8.69	313.2	66.38	361.3	3.87
		BBD4-49	0.21	4.07	0.0515971	0.65777	0.01796	0.08349	0.0009	0.394799	516.9	5.34	513.3	11	498.1	61.43	516.9	5.34
		BBD4-83	4.17	8.2	0.508537	0.6948	0.01308	0.08626	0.00089	0.548066	533.4	5.29	535.7	7.83	545.8	40.76	533.4	5.29
		BBD4-80	1.48	2.76	0.536232	0.71493	0.01698	0.08776	0.00097	0.465373	542.3	5.75	547.7	10.05	570.4	51.4	542.3	5.75
		BBD4-60	1.39	4.03	0.344913	0.71216	0.01362	0.08837	0.00089	0.526606	545.9	5.29	546	8.08	547.2	42.44	545.9	5.29
		BBD4-82	4.07	5.65	0.720354	0.75084	0.01675	0.09257	0.00102	0.493927	570.7	5.99	568.7	9.71	560.8	47.89	570.7	5.99
		BBD4-65	0.34	15.74	0.021601	0.76239	0.01866	0.09368	0.00107	0.466662	577.3	6.29	575.4	10.75	567.8	52.29	577.3	6.29
		BBD4-54	1.8	2.19	0.821918	0.83849	0.02288	0.09978	0.00109	0.400336	613.1	6.41	618.3	12.64	638.6	59.42	613.1	6.41
		BBD4-62	1.64	1.06	1.54717	0.84782	0.03715	0.101	0.00146	0.329895	620.3	8.54	623.5	20.41	634.9	93.44	620.3	8.54
		BBD4-61	8.4	44.96	0.186833	0.87533	0.01666	0.1042	0.00111	0.559696	639	6.47	638.5	9.02	636.3	40.45	639	6.47
		BBD4-86	1.38	2.91	0.474227	0.95629	0.01807	0.11229	0.00114	0.537273	686	6.6	681.4	9.38	666.4	40.63	686	6.6
		BBD4-41	0.37	1.64	0.22561	1.01506	0.03267	0.11723	0.00148	0.392252	714.6	8.55	711.4	16.46	701.7	68.5	714.6	8.55
		BBD4-57	1.62	9.21	0.175896	1.03161	0.01633	0.11798	0.00117	0.626479	718.9	6.77	719.7	8.16	722.9	34.12	718.9	6.77
		BBD4-21	0.79	2.99	0.264214	1.37951	0.02669	0.14124	0.00148	0.541602	851.7	8.35	880.2	11.39	953	40.55	851.7	8.35
		BBD4-67	1.59	5.01	0.317365	1.53538	0.02688	0.15372	0.00162	0.601965	921.8	9.08	944.7	10.77	998.6	35.37	921.8	9.08
		BBD4-11	2.12	8.61	0.246225	1.61902	0.03135	0.16312	0.00159	0.50339	974.1	8.81	977.6	12.15	985.1	41.43	974.1	8.81
		BBD4-81	4.1	5.95	0.689076	1.64105	0.04566	0.16384	0.00203	0.44531	978.1	11.22	986.1	17.55	1004.1	54.2	978.1	11.22
		BBD4-56	2.94	4.25	0.691765	1.68997	0.04866	0.16437	0.00184	0.388778	981	10.2	1004.8	18.37	1058.2	58.79	981	10.2
		BBD4-31	2.61	14.88	0.175403	1.81478	0.03151	0.17721	0.0017	0.552505	1051.7	9.31	1050.8	11.37	1048.9	36.51	1048.9	36.51
		BBD4-66	3.86	18.44	0.209328	1.86042	0.03318	0.18199	0.0019	0.585384	1077.8	10.38	1067.1	11.78	1045.5	35.6	1045.5	35.6
		BBD4-69	3.12	3.64	0.857143	2.0896	0.05087	0.19698	0.00218	0.454607	1159.1	11.73	1145.4	16.72	1119.6	48.39	1119.6	48.39
		BBD4-46	5.01	11.14	0.449731	4.04823	0.05288	0.28068	0.00258	0.703691	1594.8	13	1643.9	10.64	1708.1	25.46	1708.1	25.46
		BBD4-37	8.95	16.6	0.539157	4.92492	0.06633	0.31636	0.00299	0.701744	1771.9	14.67	1806.5	11.37	1847.2	25.49	1847.2	25.49
		BBD4-35	1.88	3.44	0.546512	9.98353	0.12566	0.43968	0.00416	0.751699	2349.2	18.64	2433.3	11.62	2505	22.33	2505	22.33
		BBD4-87	2.79	4.75	0.587368	23.6247	0.47358	0.64663	0.00746	0.575513	3215	29.2	3253	19.53	3276.7	29.92	3276.7	29.92
								Legend
				Mesozoic dated grains
				Paleozoic dated grains
				All grains older then 1Ga
			Notes:
			*Age is calculated by error propagation and included errors
			*U and U/Th concentrations are calculated against NIST 612 and are within ~20% error
			*Spot size: 24µm
			*Energy levels at 6 J/cm2 at 193 nm
			*All grains older then 1000 Ma, preferred ages are based on Pb207/Pb206
			*Grains younger then 350 Ma (based on Pb206/U238), which exhibited greater then ≥ 30% discordance
			or high common lead (Pb2006/Pb204 <1000) were excluded
			*Grains older then 350 Ma (based on Pb206/U238), which exhibited greater then ≥ 15% discordance
			or high common lead (Pb2006/Pb204 <1000) were excluded
			*1 Age correction completed by Isoplot (AGE7Corr)

## Sheet: 1F
	Sample #	Th	U	Th/U	Pb207	±	Pb206	±	Error	Pb206	± 1σ	Pb207	± 1σ	Pb207	± 1σ	Preferred	± 1σ
	Blackall-2	(In PPM)	(In PPM)		/U235	1σ	/U238	1σ	Corr.	/U238 *1	(Ma)	/U235	(Ma)	/Pb206	(Ma)	Age	(Ma)
	Blackall-02_SH070	115.92	220.04	0.526813	0.09778	0.00778	0.01459	0.00028	0.241198	93.4	1.76	94.7	7.2	128.5	181.88	93.4	1.76
	Blackall-02_SH079	592.25	761.69	0.777547	0.10287	0.00311	0.01522	0.00015	0.325991	97.4	0.98	99.4	2.86	149.7	72.64	97.4	0.98
	Blackall-02_SH055	78.61	123.9	0.634463	0.10245	0.00858	0.01534	0.00031	0.241302	98.1	1.94	99	7.91	120.6	190.94	98.1	1.94
	Blackall-02_SH007	33.04	78.75	0.419556	0.10442	0.01021	0.01552	0.00036	0.23723	99.3	2.26	100.9	9.39	138.9	219.77	99.3	2.26
	Blackall-02_SH032	114.01	163.2	0.698591	0.1036	0.0129	0.01564	0.00045	0.231071	100	2.84	100.1	11.87	102.5	276.47	100	2.84
	Blackall-02_SH073	42.04	85.48	0.491811	0.10435	0.00731	0.01578	0.00027	0.244248	100.9	1.71	100.8	6.72	96.5	163	100.9	1.71
	Blackall-02_SH088	202.47	584.21	0.346571	0.10484	0.00311	0.01582	0.00017	0.362251	101.2	1.05	101.2	2.86	103.3	71.48	101.2	1.05
	Blackall-02_SH040	243.18	382.66	0.635499	0.10515	0.00422	0.01589	0.00019	0.297938	101.6	1.19	101.5	3.87	99.2	96.49	101.6	1.19
	Blackall-02_SH022	72.33	71.62	1.00991	0.11368	0.01238	0.01619	0.00042	0.238213	103.5	2.63	109.3	11.29	238.1	238.11	103.5	2.63
	Blackall-02_SH014	16.94	39.91	0.424455	0.11266	0.01637	0.01687	0.00055	0.224372	107.8	3.5	108.4	14.94	123.3	317.08	107.8	3.5
	Blackall-02_SH031	17.57	38.56	0.455654	0.11264	0.02111	0.01689	0.00069	0.217984	108	4.38	108.4	19.27	117.9	398.25	108	4.38
	Blackall-02_SH035	155.95	717.18	0.217449	0.11395	0.00294	0.01694	0.00017	0.388958	108.3	1.06	109.6	2.68	138.2	62.23	108.3	1.06
	Blackall-02_SH009	90.43	156.67	0.5772	0.11663	0.01027	0.01733	0.00037	0.242462	110.8	2.32	112	9.33	138.6	199.21	110.8	2.32
	Blackall-02_SH039	180.93	501.7	0.360634	0.11805	0.00375	0.01743	0.00019	0.343155	111.4	1.17	113.3	3.4	154.2	75.55	111.4	1.17
	Blackall-02_SH005	256.56	400.21	0.641063	0.12081	0.00571	0.01788	0.00024	0.283995	114.2	1.5	115.8	5.18	148.9	110.38	114.2	1.5
	Blackall-02_SH059	163.41	229.02	0.713518	0.12059	0.00649	0.01805	0.00026	0.267647	115.3	1.64	115.6	5.88	122.2	125.57	115.3	1.64
	Blackall-02_SH089	101.6	204.91	0.495827	0.12525	0.00662	0.01826	0.00027	0.279758	116.6	1.69	119.8	5.97	183.9	122.17	116.6	1.69
	Blackall-02_SH054	38.57	90.1	0.42808	0.12398	0.00973	0.01858	0.00033	0.226312	118.7	2.1	118.7	8.79	119.2	179.33	118.7	2.1
	Blackall-02_SH026	111.64	143.26	0.779282	0.12483	0.00703	0.01872	0.00028	0.265593	119.6	1.75	119.4	6.35	117.3	131.15	119.6	1.75
	Blackall-02_SH074	252.22	381.99	0.660279	0.20238	0.00995	0.02942	0.0004	0.276542	186.9	2.48	187.1	8.4	191.1	114.22	186.9	2.48
	Blackall-02_SH041	135.14	224.64	0.601585	0.20622	0.0059	0.0299	0.00028	0.327315	189.9	1.78	190.4	4.97	196.8	68.57	189.9	1.78
	Blackall-02_SH001	354.47	501.5	0.70682	0.20954	0.0058	0.03005	0.00028	0.33663	190.9	1.78	193.2	4.87	223.9	65.98	190.9	1.78
	Blackall-02_SH012	219.11	311.75	0.702839	0.21448	0.00604	0.03061	0.00029	0.336422	194.4	1.83	197.3	5.05	233.9	66.93	194.4	1.83
	Blackall-02_SH029	51.9	760.9	0.0682087	0.22176	0.00313	0.03165	0.00028	0.626792	200.9	1.73	203.4	2.6	233.1	35.05	200.9	1.73
	Blackall-02_SH084	167.79	170.6	0.983529	0.23117	0.01155	0.03291	0.00045	0.273674	208.8	2.78	211.2	9.53	238.6	115.04	208.8	2.78
	Blackall-02_SH077	95.78	160.71	0.59598	0.25833	0.00948	0.03618	0.00041	0.308803	229.1	2.58	233.3	7.65	276.3	84.98	229.1	2.58
	Blackall-02_SH042	554.87	758.25	0.731777	0.26198	0.00567	0.03652	0.00034	0.430163	231.2	2.11	236.3	4.56	287.4	51.56	231.2	2.11
	Blackall-02_SH051	82.53	143.21	0.576287	0.27337	0.01776	0.03855	0.00063	0.25155	243.8	3.94	245.4	14.17	260.6	146.7	243.8	3.94
	Blackall-02_SH003	191.38	240.67	0.795197	0.27558	0.0056	0.0392	0.00035	0.439381	247.9	2.2	247.1	4.46	240.9	49.09	247.9	2.2
	Blackall-02_SH024	32.35	48.57	0.666049	0.31637	0.02106	0.04429	0.00075	0.254386	279.4	4.63	279.1	16.25	278.2	149.4	279.4	4.63
	Blackall-02_SH016	264.13	416.73	0.633816	0.32133	0.00451	0.04474	0.00039	0.621074	282.1	2.38	282.9	3.47	290.1	34.7	282.1	2.38
	Blackall-02_SH075	96.83	154.39	0.627178	0.34655	0.00932	0.04679	0.00045	0.35761	294.8	2.78	302.1	7.03	359.3	62.71	294.8	2.78
	Blackall-02_SH091	62.45	81.52	0.76607	0.38342	0.01517	0.05202	0.00064	0.310956	326.9	3.9	329.5	11.13	348.6	89.85	326.9	3.9
	Blackall-02_SH002	346.22	362.37	0.955432	0.45391	0.00644	0.06062	0.00051	0.592977	379.4	3.09	380	4.49	384.5	34.77	379.4	3.09
	Blackall-02_SH038	407.97	270.86	1.5062	0.61585	0.0138	0.07771	0.0007	0.401992	482.4	4.17	487.2	8.67	510.2	52.21	482.4	4.17
	Blackall-02_SH006	173.54	329.19	0.527173	0.62282	0.00739	0.07816	0.00067	0.722451	485.2	3.99	491.6	4.62	522.3	29.02	485.2	3.99
	Blackall-02_SH017	78.97	110.14	0.716997	0.63292	0.01244	0.07992	0.00073	0.464725	495.6	4.38	497.9	7.74	508.5	45.82	495.6	4.38
	Blackall-02_SH078	74.92	89.24	0.839534	0.65544	0.0362	0.08116	0.00131	0.292249	503	7.83	511.8	22.2	552.3	119.78	503	7.83
	Blackall-02_SH027	405.59	511.31	0.793237	0.66982	0.0082	0.08377	0.00075	0.731336	518.6	4.45	520.6	4.99	529.4	29.42	518.6	4.45
	Blackall-02_SH047	46.01	150.35	0.306019	0.674	0.01663	0.08413	0.00085	0.409483	520.8	5.07	523.1	10.09	533.5	56.2	520.8	5.07
	Blackall-02_SH004	6.1	60.28	0.101194	0.69537	0.03855	0.08632	0.00137	0.286286	533.7	8.15	536	23.09	547	120.24	533.7	8.15
	Blackall-02_SH030	49.05	84.58	0.579924	0.70625	0.03505	0.08757	0.00126	0.289925	541.1	7.47	542.5	20.86	549.9	108.4	541.1	7.47
	Blackall-02_SH060	20.8	75.87	0.274153	0.71451	0.02774	0.08963	0.00113	0.324733	553.3	6.71	547.4	16.43	523	86.1	553.3	6.71
	Blackall-02_SH045	198.71	177.29	1.12082	0.79541	0.02274	0.09661	0.00098	0.354817	594.5	5.74	594.2	12.86	593.7	63.84	594.5	5.74
	Blackall-02_SH052	81.9	294.23	0.278354	0.86614	0.01379	0.1026	0.00094	0.575446	629.6	5.52	633.5	7.5	647.6	36.29	629.6	5.52
	Blackall-02_SH063	84.06	298.89	0.281241	0.88004	0.01725	0.10334	0.00092	0.454185	634	5.4	641	9.31	666.3	44.68	634	5.4
	Blackall-02_SH092	104.09	105.08	0.990579	1.45601	0.02371	0.14745	0.00135	0.56224	886.7	7.57	912.4	9.8	975.4	35.56	886.7	7.57
	Blackall-02_SH044	62.99	158.05	0.398545	1.74306	0.02455	0.16823	0.00147	0.620404	1002.3	8.11	1024.6	9.09	1072.9	30.88	1072.9	30.88
	Blackall-02_SH090	88.73	117.6	0.754507	1.72262	0.04582	0.17179	0.00189	0.413617	1022	10.4	1017	17.09	1006.9	55.82	1006.9	55.82
	Blackall-02_SH058	52.16	340.79	0.153056	1.75823	0.02475	0.17396	0.00157	0.641137	1033.9	8.61	1030.2	9.11	1022.8	30.4	1022.8	30.4
	Blackall-02_SH015	117.77	345.21	0.341155	1.83939	0.01842	0.17506	0.00149	0.849931	1039.9	8.17	1059.6	6.59	1100.9	22.77	1100.9	22.77
	Blackall-02_SH087	113.75	472.21	0.240889	1.86988	0.02686	0.17746	0.00165	0.647279	1053.1	9.03	1070.5	9.5	1106.6	30.78	1106.6	30.78
	Blackall-02_SH019	98.3	168.93	0.581898	1.95315	0.02186	0.18065	0.0016	0.791348	1070.5	8.73	1099.5	7.52	1157.7	24.41	1157.7	24.41
	Blackall-02_SH033	96.38	143.47	0.671778	1.86987	0.02579	0.18209	0.0015	0.597262	1078.4	8.19	1070.5	9.12	1054.9	31.22	1054.9	31.22
	Blackall-02_SH021	74.05	176.88	0.418645	1.91924	0.02059	0.18322	0.00159	0.808904	1084.5	8.66	1087.8	7.16	1094.8	23.93	1094.8	23.93
	Blackall-02_SH056	103.76	145.75	0.711904	2.24641	0.02663	0.19828	0.00169	0.718995	1166.1	9.07	1195.7	8.33	1249.8	25.8	1249.8	25.8
	Blackall-02_SH065	34.22	72.61	0.471285	3.23447	0.04967	0.24605	0.00229	0.606068	1418.1	11.82	1465.5	11.91	1535.2	31.11	1535.2	31.11
	Blackall-02_SH036	103.8	316.23	0.328242	3.51697	0.03909	0.25228	0.00222	0.791723	1450.2	11.41	1531	8.79	1644.9	22.87	1644.9	22.87
	Blackall-02_SH048	56.06	126.5	0.443162	12.9812	0.1362	0.52012	0.00448	0.820941	2699.7	19.01	2678.3	9.89	2662.5	19.73	2662.5	19.73
	Blackall-02_SH008	90.93	127.95	0.710668	23.4403	0.22071	0.62828	0.00539	0.911124	3142.8	21.32	3245.4	9.17	3309.7	16.99	3309.7	16.99
	Blackall-02_SH034	213.09	288.45	0.738742	21.8665	0.2004	0.63619	0.00514	0.881572	3174	20.24	3177.8	8.9	3180.6	17.37	3180.6	17.37

## Sheet: 1G
	U-Pb LA-ICPMS detrital zircon data
	Sample Location: GSQ Eromanga-1 core (sample name: Ero; collected from core box 2-5), west of Eromanga, Queensland
	Formation: Upper Winton Formation
	Samples Description: Fine- to medium-grained sandstone; collected 0-10 m (boxes 2-5) below surface in upper Winton Formation.
	Tucker et al., 2013
	Sample #	Th	U	Th/U	Pb207	±	Pb206	±	Error	Pb206	± 1σ	Pb207	± 1σ	Pb207	± 1σ	Preferred	± 1σ
	Ero1	(In PPM)	(In PPM)		/U235	1σ	/U238	1σ	Corr.	/U238 *1	(Ma)	/U235	(Ma)	/Pb206	(Ma)	Age	(Ma)
	ERO1-34	831.7	347.69	2.39207	0.10078	0.00238	0.01453	0.00018	0.524571	93	1.14	97.5	2.19	209.2	54.06	93	1.14
	ERO1-57	54.98	13.16	4.17781	0.0991	0.00175	0.01501	0.00016	0.603636	96.1	1.03	95.9	1.62	92.6	42.85	96.1	1.03
	ERO1-84a	19.88	64.98	0.30594	0.0994	0.00215	0.01504	0.00016	0.491836	96.2	1.04	96.2	1.99	95.4	52.61	96.2	1.04
	ERO1-85	14.65	20.34	0.720256	0.10754	0.00207	0.01559	0.00017	0.566503	99.7	1.07	103.7	1.9	196.6	44.82	99.7	1.07
	ERO1-92	3.03	4.46	0.679372	0.11631	0.00234	0.01581	0.00017	0.534464	101.1	1.1	111.7	2.13	343.2	45.63	101.1	1.1
	ERO1-78	38.06	42.61	0.893218	0.10947	0.00557	0.01601	0.00024	0.294618	102.4	1.55	105.5	5.09	176.8	116.93	102.4	1.55
	ERO1-76	8.95	28.02	0.319415	0.10798	0.00187	0.01603	0.00017	0.612375	102.5	1.07	104.1	1.71	140.6	40.64	102.5	1.07
	ERO1-84	8.1	15.43	0.524951	0.11053	0.00219	0.01604	0.00017	0.53491	102.6	1.11	106.4	2	194	46.05	102.6	1.11
	ERO1-88	6.13	10.52	0.5827	0.10722	0.00293	0.01608	0.0002	0.455147	102.8	1.28	103.4	2.69	117.4	63.52	102.8	1.28
	ERO1-61	7.29	28.37	0.256962	0.10858	0.00323	0.0161	0.00019	0.396712	103	1.21	104.7	2.96	144	69.92	103	1.21
	ERO1-49	13.91	8.2	1.69634	0.10763	0.00229	0.01612	0.00017	0.495658	103.1	1.1	103.8	2.1	120.2	50.71	103.1	1.1
	ERO1-55	6.03	26.95	0.223748	0.10804	0.00235	0.01613	0.00018	0.513044	103.2	1.12	104.2	2.15	127.8	51.3	103.2	1.12
	ERO1-20	6.95	7.35	0.945578	0.11719	0.00367	0.01622	0.00019	0.374048	103.7	1.22	112.5	3.33	303.3	71.46	103.7	1.22
	ERO1-77	7.26	12.74	0.569859	0.1218	0.00347	0.01631	0.0002	0.430421	104.3	1.26	116.7	3.14	378.3	63.64	104.3	1.26
	ERO1-83	9.82	12.51	0.784972	0.11083	0.00319	0.01633	0.0002	0.425511	104.4	1.24	106.7	2.92	159.3	67.11	104.4	1.24
	ERO1-53	11.82	39.79	0.29706	0.11689	0.00275	0.01639	0.00018	0.466808	104.8	1.14	112.3	2.5	274.1	54.52	104.8	1.14
	ERO1-30	14.72	21.12	0.69697	0.11612	0.00284	0.01641	0.00019	0.473406	104.9	1.2	111.6	2.59	256.2	56.18	104.9	1.2
	ERO1-3	9.43	18.48	0.510281	0.1127	0.00224	0.01642	0.00018	0.551538	105	1.12	108.4	2.04	184.5	46.4	105	1.12
	ERO1-33	10.42	13.85	0.752347	0.1128	0.0026	0.01642	0.00018	0.475593	105	1.15	108.5	2.37	186.4	53.92	105	1.15
	ERO1-80	11.74	18.09	0.648977	0.11188	0.00238	0.01643	0.00018	0.515004	105	1.14	107.7	2.18	167.3	49.84	105	1.14
	ERO1-31	7.48	14.45	0.517647	0.112	0.00274	0.01648	0.00018	0.44646	105.4	1.14	107.8	2.5	162.3	57.78	105.4	1.14
	ERO1-25	3.68	8.1	0.454321	0.11709	0.00312	0.01651	0.00019	0.431889	105.6	1.2	112.4	2.84	260.9	61.29	105.6	1.2
	ERO1-73	23.16	33.2501	0.696539	0.10795	0.00231	0.01652	0.00018	0.509182	105.6	1.17	104.1	2.12	69	51.57	105.6	1.17
	ERO1-81	9.52	7.84	1.21429	0.10981	0.00249	0.01653	0.00018	0.480222	105.7	1.15	105.8	2.28	108.9	53.69	105.7	1.15
	ERO1-69	30.4446	23.0226	1.32238	0.11149	0.00213	0.01655	0.00017	0.537659	105.8	1.1	107.3	1.95	141.4	45.53	105.8	1.1
	ERO1-46	10.54	9.79	1.07661	0.10731	0.00271	0.01657	0.00018	0.430151	105.9	1.15	103.5	2.49	47.8	61.29	105.9	1.15
	ERO1-68	30.6498	37.5934	0.815298	0.11523	0.00311	0.01661	0.00019	0.423828	106.2	1.19	110.7	2.83	209	63.34	106.2	1.19
	ERO1-28	13.17	16.75	0.786269	0.11145	0.00262	0.01662	0.00019	0.486297	106.3	1.18	107.3	2.39	130.4	55.37	106.3	1.18
	ERO1-13	36.1	44.14	0.817852	0.11284	0.00178	0.01666	0.00017	0.64687	106.5	1.1	108.6	1.63	153.7	37.15	106.5	1.1
	ERO1-41	6.82	5.81	1.17384	0.11016	0.00335	0.01672	0.00019	0.373677	106.9	1.24	106.1	3.06	87.8	73.14	106.9	1.24
	ERO1-10	8.08	17.22	0.469222	0.11153	0.00317	0.01673	0.0002	0.420597	107	1.27	107.4	2.89	116.3	66.71	107	1.27
	ERO1-54	30.26	16.85	1.79585	0.11443	0.00248	0.01674	0.00018	0.496141	107	1.16	110	2.26	175.3	50.82	107	1.16
	ERO1-64	17.7	21.8	0.811927	0.11367	0.00246	0.01674	0.00018	0.496853	107	1.17	109.3	2.25	160.7	51	107	1.17
	ERO1-29	8.37	16.87	0.496147	0.11623	0.00223	0.01675	0.00018	0.560107	107.1	1.13	111.6	2.03	210	44.73	107.1	1.13
	ERO1-50	7.69	23.42	0.328352	0.11149	0.00229	0.01679	0.00018	0.521942	107.3	1.15	107.3	2.09	107.7	48.67	107.3	1.15
	ERO1-66	22.5	12.6793	1.77455	0.11633	0.0026	0.01681	0.00019	0.505713	107.4	1.18	111.7	2.36	204.6	52.05	107.4	1.18
	ERO1-48	6.56	13.09	0.501146	0.12177	0.00473	0.01684	0.00022	0.336325	107.7	1.37	116.7	4.28	305	88.53	107.7	1.37
	ERO1-36	36.47	39.66	0.919566	0.11401	0.00232	0.01688	0.00018	0.524029	107.9	1.11	109.6	2.12	146.9	48.55	107.9	1.11
	ERO1-24	7.92	13.05	0.606897	0.11585	0.00319	0.0169	0.00019	0.408293	108	1.21	111.3	2.9	182	64.54	108	1.21
	ERO1-70	12.044	12.3727	0.973433	0.11765	0.00312	0.01689	0.00019	0.424191	108	1.22	112.9	2.83	218.8	61.63	108	1.22
	ERO1-82	13.42	20.93	0.641185	0.11261	0.00239	0.01691	0.00019	0.529406	108.1	1.21	108.4	2.18	114.2	49.61	108.1	1.21
	ERO1-58	11.27	76.95	0.146459	0.11056	0.00232	0.01692	0.00018	0.50697	108.2	1.17	106.5	2.12	68.5	50.74	108.2	1.17
	ERO1-67	23.5435	14.1214	1.66722	0.114	0.00257	0.01692	0.00019	0.49811	108.2	1.19	109.6	2.34	141.7	53.1	108.2	1.19
	ERO1-4	2.42	5.09	0.475442	0.11964	0.00388	0.01697	0.00021	0.381577	108.4	1.31	114.7	3.52	247.6	74.59	108.4	1.31
	ERO1-9	6.38	8.87	0.719278	0.11829	0.00309	0.01697	0.00019	0.428609	108.5	1.22	113.5	2.81	221.1	60.56	108.5	1.22
	ERO1-32	6.09	11.08	0.549639	0.1233	0.00465	0.01703	0.00023	0.358116	108.9	1.44	118.1	4.21	307.7	85.55	108.9	1.44
	ERO1-38	7.32	11.1	0.659459	0.11732	0.0032	0.01708	0.00019	0.407838	109.2	1.22	112.6	2.91	186.6	64.03	109.2	1.22
	ERO1-45	4.19	11.11	0.377138	0.13154	0.00349	0.01708	0.0002	0.441341	109.2	1.25	125.5	3.13	446.7	59.23	109.2	1.25
	ERO1-22	6.32	14.81	0.426739	0.11551	0.00486	0.01714	0.00024	0.3328	109.6	1.51	111	4.43	142.2	97.88	109.6	1.51
	ERO1-44	6.69	22.4	0.298661	0.12044	0.00312	0.01715	0.00019	0.427667	109.6	1.2	115.5	2.83	238.7	60.29	109.6	1.2
	ERO1-56	12.11	13.05	0.927969	0.11666	0.00317	0.01729	0.0002	0.425694	110.5	1.26	112	2.89	144.7	64.08	110.5	1.26
	ERO1-94	5.25	10.46	0.501912	0.11635	0.00464	0.01747	0.00023	0.330129	111.7	1.48	111.8	4.22	113.6	93.25	111.7	1.48
	ERO1-7	19.56	26.28	0.744292	0.119	0.00286	0.01781	0.00019	0.443885	113.8	1.22	114.2	2.6	122.3	57.28	113.8	1.22
	ERO1-60	21.2	9.45	2.24339	0.11928	0.00387	0.01787	0.00023	0.396698	114.2	1.44	114.4	3.51	120.5	76.02	114.2	1.44
	ERO1-86	35.7	21.71	1.6444	0.11925	0.00489	0.0179	0.00024	0.32697	114.4	1.53	114.4	4.43	114.9	95.45	114.4	1.53
	ERO1-51	15.22	13.52	1.12574	0.11983	0.00327	0.01793	0.00021	0.429197	114.5	1.36	114.9	2.96	123.4	64.03	114.5	1.36
	ERO1-23	15.07	33.56	0.449046	0.12463	0.00216	0.01842	0.0002	0.626483	117.6	1.25	119.3	1.95	152.2	40.48	117.6	1.25
	ERO1-11	14.28	25.15	0.567793	0.12685	0.00244	0.01869	0.0002	0.556316	119.4	1.24	121.3	2.2	158.9	45.43	119.4	1.24
	ERO1-37	20.57	20.68	0.994681	0.12707	0.00365	0.01895	0.00022	0.40417	121	1.38	121.5	3.29	130.7	67.94	121	1.38
	ERO1-65	35.934	25.22	1.42482	0.10639	0.00383	0.01896	0.00023	0.33697	121.1	1.48	102.7	3.51	0.1	0	121.1	1.48
	ERO1-79	9.02	26.89	0.335441	0.13621	0.00368	0.01898	0.00022	0.42903	121.2	1.39	129.7	3.29	288.5	61.74	121.2	1.39
	ERO1-14	3.73	11.89	0.313709	0.13538	0.00321	0.01909	0.00021	0.463941	121.9	1.33	128.9	2.87	259.9	54.91	121.9	1.33
	ERO1-15	26.53	32.01	0.828803	0.14383	0.00299	0.01989	0.00022	0.532067	126.9	1.39	136.4	2.66	305.4	47.4	126.9	1.39
	ERO1-98	11.48	15.41	0.744971	0.14606	0.00639	0.02137	0.0003	0.320883	136.3	1.88	138.4	5.66	176.2	101.1	136.3	1.88
	ERO1-93	9.5	10.61	0.895382	0.15895	0.0031	0.02203	0.00024	0.558593	140.4	1.52	149.8	2.71	300.5	44.31	140.4	1.52
	ERO1-5	5.8	29.11	0.199244	0.15048	0.00269	0.02238	0.00023	0.574903	142.7	1.46	142.3	2.37	137.4	42.44	142.7	1.46
	ERO1-40	5.63	28.36	0.198519	0.17249	0.00343	0.02436	0.00027	0.557386	155.2	1.67	161.6	2.97	257.3	45.9	155.2	1.67
	ERO1-42	10.5	35.09	0.299231	0.1999	0.00439	0.02709	0.00029	0.487458	172.3	1.83	185	3.71	350.3	49.82	172.3	1.83
	ERO1-97	5.53	7.31	0.756498	1.31983	0.01717	0.02983	0.00033	0.850371	189.5	2.04	854.4	7.51	3574.1	20.19	189.5	2.04
	ERO1-72	26.559	13.8764	1.91397	0.21178	0.00463	0.03104	0.00033	0.486291	197	2.08	195	3.88	171	51.82	197	2.08
	ERO1-6	12.14	18.27	0.664477	0.23354	0.00441	0.03116	0.00034	0.577835	197.8	2.13	213.1	3.63	386.3	42.16	197.8	2.13
	ERO1-62	12.42	13.78	0.901306	0.2247	0.00566	0.03155	0.00035	0.440408	200.3	2.16	205.8	4.7	270	58.85	200.3	2.16
	ERO1-52	13.4	23.09	0.580338	0.21964	0.00452	0.03224	0.00036	0.542601	204.6	2.22	201.6	3.76	167.9	48.17	204.6	2.22
	ERO1-43	13.22	30.93	0.427417	0.22823	0.00405	0.03258	0.00035	0.605389	206.7	2.17	208.7	3.35	232.3	41.11	206.7	2.17
	ERO1-59	5.44	21.06	0.25831	0.23085	0.00462	0.03289	0.00035	0.531731	208.6	2.2	210.9	3.81	236.8	46.53	208.6	2.2
	ERO1-21	12.79	84.58	0.151218	0.22917	0.00405	0.03318	0.00036	0.613944	210.4	2.26	209.5	3.35	199.7	40.8	210.4	2.26
	ERO1-95	38.9	23.08	1.68544	0.23083	0.00378	0.0334	0.00035	0.639915	211.8	2.17	210.9	3.12	201	38.23	211.8	2.17
	ERO1-63	13.42	27.33	0.491035	0.24672	0.00711	0.03365	0.00043	0.443423	213.4	2.66	223.9	5.79	336.7	65.23	213.4	2.66
	ERO1-99	22.7	26.76	0.848281	0.27107	0.00542	0.03855	0.00041	0.531914	243.9	2.54	243.5	4.33	241	46.51	243.9	2.54
	ERO1-75	15.74	54.76	0.287436	0.27938	0.00507	0.03993	0.00041	0.565812	252.4	2.53	250.2	4.02	229.5	42.65	252.4	2.53
	ERO1-89	19.16	23.69	0.80878	0.29247	0.00442	0.04081	0.00044	0.71342	257.8	2.7	260.5	3.47	284.7	34.13	257.8	2.7
	ERO1-100	16.27	9.34	1.74197	0.30839	0.01698	0.04248	0.00069	0.295004	268.2	4.27	272.9	13.18	314.1	123.19	268.2	4.27
	ERO1-27	25.01	48.66	0.513975	0.3251	0.00506	0.0452	0.00045	0.639647	285	2.8	285.8	3.88	292.5	36.38	285	2.8
	ERO1-96	3.45	7.33	0.470668	0.33377	0.00834	0.04582	0.00055	0.480384	288.8	3.39	292.4	6.35	322	56.1	288.8	3.39
	ERO1-91	2.66	5.63	0.472469	0.40842	0.0077	0.05506	0.00061	0.587638	345.5	3.71	347.7	5.55	362.6	42.41	345.5	3.71
	ERO1-12	8.76	15.5	0.565161	0.64729	0.009	0.08065	0.00083	0.740168	500	4.95	506.8	5.55	537.2	31.13	500	4.95
	ERO1-71	50.3	15.4736	3.2507	0.68091	0.01156	0.08515	0.00092	0.636407	526.8	5.45	527.3	6.98	529.8	37.69	526.8	5.45
	ERO1-35	4.01	6.61	0.606657	0.89724	0.01901	0.10671	0.00118	0.521919	653.6	6.88	650.2	10.17	639.1	45.91	653.6	6.88
	ERO1-16	1.89	6.62	0.285498	1.31487	0.01829	0.13848	0.00143	0.742366	836.1	8.11	852.3	8.02	894.8	28.83	836.1	8.11
	ERO1-39	6.48	12.65	0.512253	1.45726	0.02078	0.15026	0.00153	0.714068	902.4	8.59	912.9	8.59	938.4	29.67	902.4	8.59
	ERO1-19	10.57	23.98	0.440784	1.56658	0.02375	0.15351	0.00164	0.704687	920.6	9.15	957.1	9.4	1042	30.45	920.6	9.15
	ERO1-26	9.78	18.03	0.542429	1.72649	0.02358	0.17004	0.0017	0.732012	1012.3	9.35	1018.4	8.78	1031.8	28.26	1031.8	28.26
	ERO1-1	15.3	68.3	0.224012	3.72939	0.05142	0.28013	0.00279	0.722354	1592	14.04	1577.7	11.04	1558.7	26.47	1558.7	26.47
	ERO1-17	3.87	24.36	0.158867	4.2405	0.0592	0.29827	0.00303	0.72766	1682.7	15.06	1681.9	11.47	1681	26.17	1681	26.17
	ERO1-87	1.128	3.12	0.361538	19.4129	0.21749	0.61105	0.00628	0.91735	3074.2	25.11	3062.6	10.82	3055.2	17.73	3055.2	17.73
	ERO1-18	13.08	33.36	0.392086	24.6165	0.29361	0.64783	0.00655	0.847686	3219.7	25.62	3293.1	11.64	3338.2	18.76	3338.2	18.76

## Sheet: 1H
	U-Pb LA-ICPMS detrital zircon data
	Sample Location: Isisford, Queensland
	Formation: Within "Blacksoil", situated just above unexposed Winton Formation
	Samples Description: Medium- to coarse-grained dinosaur entombing concretion
	Tucker et al., 2013
	Sample #	Th	U	Th/U	Pb207	±	Pb206	±	Error	Pb206	± 1σ	Pb207	± 1σ	Pb207	± 1σ	Prefered	± 1σ
	Isisford, Qld	(In PPM)	(In PPM)	(In PPM)	/U235	MA	/U238	MA	Corr.	/U238 *1	(Ma)	/U235	(Ma)	/Pb206	(Ma)	Age	(Ma)
	ISIS-43	210.58	131.66	1.59942	0.1052	0.00333	0.01572	0.00018	0.361736	100.5	1.14	101.6	3.06	125.9	74.85	100.5	1.14
	ISIS-5	60.12	115.53	0.520384	0.10857	0.00432	0.01598	0.00021	0.33027	102.2	1.33	104.7	3.96	161.5	92.27	102.2	1.33
	ISIS-44	251.26	151.51	1.65837	0.10939	0.00301	0.01597	0.00017	0.386861	102.2	1.1	105.4	2.76	179.7	64.87	102.2	1.1
	ISIS-25	124.64	180.39	0.690947	0.10627	0.003	0.016	0.00018	0.398513	102.3	1.13	102.5	2.75	108.3	67.32	102.3	1.13
	ISIS-50	28.08	29.76	0.943548	0.10954	0.00838	0.01618	0.00031	0.250445	103.5	1.96	105.5	7.67	153.3	173.53	103.5	1.96
	ISIS-10	113	166.62	0.67819	0.10566	0.00318	0.01627	0.00018	0.367594	104.1	1.15	102	2.92	53.7	72.77	104.1	1.15
	ISIS-2	61.98	118.78	0.521805	0.12203	0.00471	0.01639	0.00021	0.33196	104.8	1.35	116.9	4.26	371	86.59	104.8	1.35
	ISIS-40	561.9	135.48	4.14748	0.11055	0.00381	0.01639	0.00021	0.37177	104.8	1.31	106.5	3.49	143.5	80.53	104.8	1.31
	ISIS-69	518.98	195.25	2.65803	0.11028	0.00421	0.01654	0.00022	0.348419	105.7	1.38	106.2	3.85	117.7	90.48	105.7	1.38
	ISIS-51	203.98	152.4	1.33845	0.11128	0.00329	0.0167	0.00019	0.384821	106.8	1.18	107.1	3.01	116.1	70.47	106.8	1.18
	ISIS-64	115.7	62.73	1.84441	0.11236	0.00508	0.01675	0.00023	0.303711	107.1	1.46	108.1	4.63	132.1	105.99	107.1	1.46
	ISIS-28	174.78	338.91	0.515712	0.11183	0.00287	0.01683	0.00018	0.41674	107.6	1.12	107.6	2.62	109.2	62.01	107.6	1.12
	ISIS-59	276.87	178.79	1.54858	0.11801	0.00372	0.01692	0.00019	0.356229	108.1	1.24	113.3	3.38	222.9	73.75	108.1	1.24
	ISIS-20	92.38	112.97	0.817739	0.11607	0.00334	0.01706	0.00018	0.366663	109.1	1.15	111.5	3.04	164.4	68.09	109.1	1.15
	ISIS-30	88.89	162.66	0.546477	0.11387	0.0033	0.01725	0.00018	0.360063	110.2	1.12	109.5	3.01	92.8	71.3	110.2	1.12
	ISIS-65	288.81	126.99	2.27427	0.11783	0.00344	0.01725	0.00019	0.377278	110.3	1.21	113.1	3.12	173.6	69.33	110.3	1.21
	ISIS-42	141.69	136.97	1.03446	0.11857	0.00441	0.01757	0.00022	0.336657	112.3	1.37	113.8	4	146	87.02	112.3	1.37
	ISIS-26	29.41	53.16	0.553236	0.12093	0.00457	0.01765	0.00021	0.314842	112.8	1.31	115.9	4.14	181.5	88.14	112.8	1.31
	ISIS-54	136.24	92.18	1.47798	0.13314	0.00744	0.01861	0.00029	0.278861	118.9	1.85	126.9	6.66	281.3	126.26	118.9	1.85
	ISIS-24	63.82	68.56	0.930863	0.12592	0.00484	0.01888	0.00022	0.303159	120.6	1.41	120.4	4.36	117.8	91.1	120.6	1.41
	ISIS-4	176.35	349.31	0.504852	0.12837	0.00223	0.01935	0.00019	0.565238	123.5	1.19	122.6	2	105.3	42.21	123.5	1.19
	ISIS-48	165.95	126.2	1.31498	0.1294	0.0055	0.01934	0.00026	0.316292	123.5	1.66	123.6	4.94	125.4	99.27	123.5	1.66
	ISIS-62	252.19	149.84	1.68306	0.13637	0.00432	0.01958	0.00022	0.354687	125	1.41	129.8	3.86	218.7	74.43	125	1.41
	ISIS-57	315.62	159.39	1.98017	0.13429	0.00381	0.01967	0.00021	0.376299	125.6	1.36	127.9	3.41	172.8	67.32	125.6	1.36
	ISIS-41	97.06	59.21	1.63925	0.17399	0.00755	0.02436	0.00033	0.312186	155.2	2.07	162.9	6.53	276.7	98.41	155.2	2.07
	ISIS-17	34.12	44.99	0.758391	0.18203	0.00861	0.02547	0.00036	0.298823	162.1	2.29	169.8	7.39	278.4	107.07	162.1	2.29
	ISIS-70	231.03	152.27	1.51724	0.17644	0.0051	0.02581	0.00029	0.38872	164.3	1.79	165	4.4	175.5	68.96	164.3	1.79
	ISIS-23	102.57	72.6	1.41281	0.22162	0.00654	0.03135	0.00032	0.345894	199	2.02	203.3	5.44	253.1	69.75	199	2.02
	ISIS-39	165.86	91.83	1.80616	0.21785	0.00886	0.03164	0.00043	0.334161	200.8	2.68	200.1	7.38	192.5	93.75	200.8	2.68
	ISIS-3	206.29	258.95	0.79664	0.22565	0.00376	0.03175	0.00032	0.604858	201.5	1.98	206.6	3.11	265.8	39.11	201.5	1.98
	ISIS-12	65.82	78.09	0.842874	0.23348	0.00743	0.03315	0.00036	0.341256	210.2	2.26	213.1	6.11	245.1	74.23	210.2	2.26
	ISIS-61	305.97	218.59	1.39974	0.24164	0.01159	0.03474	0.00051	0.306074	220.2	3.18	219.8	9.48	216.3	110.85	220.2	3.18
	ISIS-14	80.05	121.04	0.661352	0.25395	0.00727	0.03518	0.00041	0.407101	222.9	2.55	229.8	5.89	301.5	65.5	222.9	2.55
	ISIS-8	193.52	220.71	0.876807	0.25399	0.0062	0.0357	0.00038	0.436054	226.1	2.39	229.8	5.02	268.2	56.76	226.1	2.39
	ISIS-15	95.12	89.09	1.06768	0.25363	0.00607	0.03593	0.00036	0.418656	227.5	2.27	229.5	4.92	250.3	56.38	227.5	2.27
	ISIS-47	227.69	134.81	1.68897	0.25204	0.0075	0.03603	0.00042	0.391736	228.2	2.62	228.2	6.08	228.7	68.93	228.2	2.62
	ISIS-38	388.4	318.61	1.21905	0.24928	0.00804	0.03631	0.00044	0.375714	229.9	2.71	226	6.53	185.9	74.6	229.9	2.71
	ISIS-55	262.05	124.1	2.1116	0.26014	0.01028	0.03648	0.00049	0.339903	231	3.06	234.8	8.28	273.6	90.31	231	3.06
	ISIS-52	213.03	105.1	2.02693	0.26733	0.01002	0.0372	0.00047	0.337081	235.4	2.9	240.6	8.03	291.4	85.62	235.4	2.9
	ISIS-6	148.48	283.31	0.52409	0.26666	0.0048	0.03864	0.0004	0.575095	244.4	2.46	240	3.85	198	42.49	244.4	2.46
	ISIS-9	40.69	81.63	0.498469	0.30521	0.00809	0.04157	0.00045	0.408397	262.6	2.81	270.5	6.29	339.7	60.4	262.6	2.81
	ISIS-18	63.03	178.62	0.352872	0.32039	0.0074	0.04462	0.00051	0.494866	281.4	3.14	282.2	5.69	289.3	52.75	281.4	3.14
	ISIS-56	439.6	60.87	7.22195	0.31979	0.00936	0.0453	0.00053	0.39973	285.6	3.25	281.7	7.2	250.2	67.94	285.6	3.25
	ISIS-13	89.27	226.55	0.394041	0.32909	0.00567	0.04649	0.00043	0.536835	292.9	2.63	288.9	4.33	256.9	41.69	292.9	2.63
	ISIS-66	290.76	204.63	1.42091	0.43808	0.01474	0.05908	0.00069	0.347108	370	4.21	368.9	10.4	362.3	77.16	370	4.21
	ISIS-45	343.63	49.9	6.88637	0.57342	0.01531	0.07362	0.00083	0.42226	457.9	5.01	460.2	9.88	471.1	59.66	457.9	5.01
	ISIS-1	44.39	85.62	0.518454	0.67417	0.01406	0.08443	0.00092	0.522487	522.5	5.46	523.2	8.53	526.1	46.43	522.5	5.46
	ISIS-11	148.65	367.93	0.404017	0.69816	0.00888	0.08598	0.00079	0.72239	531.7	4.7	537.7	5.31	563.5	29.86	531.7	4.7
	ISIS-49	163.77	69.17	2.36764	0.71478	0.02118	0.08796	0.00098	0.376	543.4	5.79	547.6	12.54	565.2	65.2	543.4	5.79
	ISIS-21	37.18	77.86	0.477524	0.74808	0.01391	0.09108	0.00094	0.555042	561.9	5.54	567.1	8.08	588.3	41.42	561.9	5.54
	ISIS-34	40.18	120.47	0.333527	0.82029	0.01716	0.10022	0.00102	0.486515	615.7	5.99	608.2	9.57	580.4	47.3	615.7	5.99
	ISIS-72	205.23	39.62	5.17996	1.01624	0.04228	0.11778	0.00166	0.338764	717.8	9.57	712	21.29	694.6	89.52	717.8	9.57
	ISIS-22	36.76	83.24	0.441615	1.56343	0.02438	0.15888	0.00157	0.633688	950.6	8.71	955.8	9.66	968.3	33.27	950.6	8.71
	ISIS-53	197.74	59.36	3.3312	1.65352	0.05363	0.16669	0.00213	0.393978	993.8	11.76	990.9	20.52	984.7	66.17	993.8	11.76
	ISIS-46	153.54	102.52	1.49766	1.74533	0.04832	0.17514	0.00197	0.406286	1040.4	10.79	1025.4	17.87	994	56.71	994	56.71
	ISIS-32	77.17	179.83	0.429128	2.06545	0.04666	0.18653	0.0021	0.498357	1102.6	11.43	1137.4	15.45	1205.2	45.79	1205.2	45.79
	ISIS-58	157.75	268.52	0.58748	1.98967	0.04814	0.19054	0.00201	0.435998	1124.3	10.86	1112	16.35	1088.4	49.71	1088.4	49.71
	ISIS-27	39.4	89.69	0.439291	11.3967	0.13125	0.45428	0.00413	0.789417	2414.3	18.31	2556.2	10.75	2671	20.9	2671	20.9
	ISIS-68	230.71	64.53	3.57524	12.8449	0.62898	0.48835	0.00779	0.325761	2563.6	33.73	2668.3	46.13	2749.1	80.65	2749.1	80.65
	ISIS-67	74.33	31.84	2.33448	17.01	0.53937	0.57667	0.00678	0.370784	2935.1	27.7	2935.4	30.41	2935.9	52.68	2935.9	52.68
	ISIS-29	13.21	18.02	0.733074	22.1319	0.27691	0.61423	0.00596	0.775523	3086.9	23.82	3189.5	12.16	3255	21.14	3255	21.14

## Sheet: 1I
	U-Pb LA-ICPMS detrital zircon data
	Sample Location: GSQ LONGREACH-1 core (sample name: Longmac1, collected from core boxs 1-6), west of Longreach, Queensland
	Formation: Upper Makunda Formation
	Samples Description: Fine- to medium-grained sandstone; collected 5-15 m below surface in upper Mackunda Formation.
	Tucker et al., 2013
	Sample #	Th	U	Th/U	Pb207	±	Pb206	±	Error	Pb206	± 1σ	Pb207	± 1σ	Pb207	± 1σ	Preferred	± 1σ
	Longmac1	(In PPM)	(In PPM)		/U235	1σ	/U238	1σ	Corr.	/U238 *1	(Ma)	/U235	(Ma)	/Pb206	(Ma)	Age	(Ma)
	Longmac1-72	16.01	20.61	0.776807	0.10978	0.00378	0.01603	0.0002	0.36235	102.5	1.25	105.8	3.46	179.3	80.63	102.5	1.25
	Longmac1-10	2.52	3.07	0.820847	0.10761	0.00639	0.01606	0.00025	0.262148	102.7	1.57	103.8	5.86	129.5	137.08	102.7	1.57
	Longmac1-7	5.45	11.2	0.486607	0.114	0.00556	0.01631	0.00024	0.301708	104.3	1.55	109.6	5.07	227.3	111.31	104.3	1.55
	Longmac1-34	8.81	8.69	1.01381	0.11208	0.00378	0.01632	0.00019	0.345199	104.3	1.23	107.9	3.46	186.7	78.78	104.3	1.23
	Longmac1-19	17.57	16.07	1.09334	0.11215	0.00413	0.01636	0.00019	0.315369	104.6	1.23	107.9	3.77	182.3	86.14	104.6	1.23
	Longmac1-51	20.21	40.57	0.498151	0.10788	0.0019	0.01656	0.00016	0.548589	105.9	1.02	104	1.74	61.9	43.77	105.9	1.02
	Longmac1-50	4.69	6.18	0.7589	0.10935	0.00413	0.01664	0.0002	0.318233	106.4	1.26	105.4	3.78	81.7	90.34	106.4	1.26
	Longmac1-8	6.89	11.39	0.604917	0.10767	0.00317	0.01666	0.00019	0.387359	106.5	1.23	103.8	2.9	42.9	70.58	106.5	1.23
	Longmac1-18	15.29	17.88	0.855145	0.11175	0.00271	0.01682	0.00018	0.441291	107.5	1.14	107.6	2.48	108.6	57.95	107.5	1.14
	Longmac1-64	7.01	18.19	0.385377	0.1119	0.00247	0.01693	0.00017	0.45491	108.2	1.1	107.7	2.25	94.9	54.48	108.2	1.1
	Longmac1-47	12.93	13.12	0.985518	0.11509	0.00306	0.01694	0.00019	0.421848	108.3	1.18	110.6	2.78	160.5	62.73	108.3	1.18
	Longmac1-40	4.18	5.53	0.755877	0.11271	0.00623	0.01719	0.00026	0.273635	109.9	1.67	108.4	5.68	76.8	129.76	109.9	1.67
	Longmac1-3	15.61	26.26	0.59444	0.11545	0.00427	0.01735	0.00021	0.327255	110.9	1.35	110.9	3.88	113	87.03	110.9	1.35
	Longmac1-42	3.64	4.94	0.736842	0.11556	0.00697	0.01737	0.00028	0.267259	111	1.75	111	6.34	112.2	139.84	111	1.75
	Longmac1-44	4.71	4.35	1.08276	0.11946	0.00493	0.01754	0.00022	0.303927	112.1	1.41	114.6	4.47	167.6	96.14	112.1	1.41
	Longmac1-26	8.81	10.91	0.807516	0.12513	0.00368	0.01842	0.00021	0.387653	117.7	1.32	119.7	3.32	160.3	69.15	117.7	1.32
	Longmac1-33	3.74	8.84	0.423077	0.12967	0.00504	0.01843	0.00023	0.321079	117.7	1.47	123.8	4.53	242.2	89.46	117.7	1.47
	Longmac1-21	23.46	16.64	1.40986	0.12821	0.00562	0.01883	0.00025	0.302883	120.3	1.61	122.5	5.06	165.7	101.78	120.3	1.61
	Longmac1-16	4.43	7.59	0.583663	0.12221	0.00548	0.01891	0.00024	0.283039	120.8	1.54	117.1	4.96	42.9	106.88	120.8	1.54
	Longmac1-24	8.34	16.02	0.520599	0.1271	0.00418	0.01914	0.00022	0.349502	122.2	1.42	121.5	3.76	107.8	77.77	122.2	1.42
	Longmac1-1	18.62	34.58	0.538462	0.14766	0.0035	0.02188	0.00024	0.462763	139.5	1.53	139.8	3.1	145.2	55.79	139.5	1.53
	Longmac1-60	2.71	5.43	0.499079	0.15844	0.00512	0.02222	0.00025	0.34817	141.6	1.61	149.3	4.49	273.5	74.6	141.6	1.61
	Longmac1-54	11.75	14.3	0.821678	0.17914	0.00486	0.02278	0.00026	0.420703	145.2	1.62	167.3	4.18	493	61.14	145.2	1.62
	Longmac1-37	26.7	29.84	0.894772	0.15871	0.00303	0.02347	0.00024	0.535624	149.6	1.5	149.6	2.65	149.8	45.62	149.6	1.5
	Longmac1-55	20.49	44.13	0.46431	0.17775	0.00289	0.02636	0.00025	0.583319	167.7	1.59	166.1	2.49	144	39.74	167.7	1.59
	Longmac1-13	2.11	3.84	0.549479	0.19829	0.01061	0.02834	0.00044	0.29016	180.2	2.79	183.7	8.99	229.2	121.55	180.2	2.79
	Longmac1-31	21.11	11.79	1.7905	0.21027	0.00952	0.02939	0.0004	0.300608	186.8	2.52	193.8	7.99	280.3	103.19	186.8	2.52
	Longmac1-12	5.62	9.62	0.5842	0.21885	0.00615	0.0302	0.00035	0.412413	191.8	2.19	200.9	5.12	310	64.07	191.8	2.19
	Longmac1-20	6.34	7.05	0.899291	0.24772	0.00562	0.03022	0.00032	0.466746	191.9	2.03	224.7	4.57	583.7	50.03	191.9	2.03
	Longmac1-14	14.53	23.16	0.627375	0.2071	0.00377	0.03032	0.00031	0.561657	192.5	1.91	191.1	3.17	174	43.35	192.5	1.91
	Longmac1-25	8.57	9.74	0.879877	0.20734	0.00484	0.03056	0.00032	0.448574	194	2	191.3	4.07	158.4	55.48	194	2
	Longmac1-53	6.13	11.73	0.522592	0.2163	0.00679	0.03132	0.00037	0.376328	198.8	2.33	198.8	5.67	199.5	73.14	198.8	2.33
	Longmac1-5	16.87	23.97	0.703796	0.21314	0.00362	0.03136	0.00031	0.582026	199.1	1.94	196.2	3.03	161.9	40.65	199.1	1.94
	Longmac1-46	9.66	18.39	0.525285	0.22042	0.00394	0.03197	0.00032	0.559967	202.9	1.98	202.3	3.28	195.4	42.72	202.9	1.98
	Longmac1-28	5.65	4.56	1.23904	0.22089	0.01006	0.03241	0.00044	0.298093	205.6	2.73	202.6	8.37	168.5	105.81	205.6	2.73
	Longmac1-23	15	20.51	0.731351	0.22418	0.004	0.03283	0.00032	0.546281	208.2	2.03	205.4	3.32	173.1	42.71	208.2	2.03
	Longmac1-2	14.97	13.77	1.08715	0.25524	0.00803	0.0365	0.00046	0.400588	231.1	2.86	230.8	6.5	228.2	72.18	231.1	2.86
	Longmac1-35	4.16	5.9	0.705085	0.27318	0.00824	0.03737	0.00044	0.390347	236.5	2.72	245.2	6.57	329.9	68.89	236.5	2.72
	Longmac1-45	14.02	15.78	0.888466	0.25683	0.00573	0.03769	0.0004	0.475691	238.5	2.5	232.1	4.63	167.8	52.82	238.5	2.5
	Longmac1-65	22.06	27.33	0.807172	0.27105	0.00446	0.03903	0.00038	0.591697	246.8	2.34	243.5	3.56	212.2	39.67	246.8	2.34
	Longmac1-62	28.87	26.83	1.07603	0.28983	0.00572	0.041	0.00044	0.543771	259.1	2.7	258.4	4.5	252.7	46.02	259.1	2.7
	Longmac1-43	12.51	21.15	0.591489	0.29262	0.00668	0.04181	0.00044	0.460999	264	2.74	260.6	5.25	230.2	53.67	264	2.74
	Longmac1-48	18.33	31.16	0.588254	0.29355	0.00477	0.04183	0.00041	0.603198	264.1	2.53	261.3	3.74	236.6	38.76	264.1	2.53
	Longmac1-27	5.45	14.72	0.370245	0.32357	0.00743	0.04569	0.00051	0.486103	288	3.16	284.6	5.7	257.5	52.83	288	3.16
	Longmac1-22	4.9	12.53	0.391061	0.33008	0.01266	0.0463	0.00064	0.3604	291.8	3.97	289.6	9.66	272.6	86.88	291.8	3.97
	Longmac1-49	12.42	22.28	0.557451	0.40177	0.0062	0.05475	0.00052	0.615467	343.6	3.19	342.9	4.49	338.6	36.38	343.6	3.19
	Longmac1-41	1.66	3.68	0.451087	0.44955	0.0159	0.0603	0.00078	0.365728	377.5	4.72	377	11.14	373.9	79.34	377.5	4.72
	Longmac1-9	5.66	9.14	0.619256	0.51472	0.00875	0.06918	0.00068	0.578218	431.2	4.13	421.6	5.86	369.9	39.41	431.2	4.13
	Longmac1-15	15.31	20.15	0.759801	0.59548	0.01165	0.07635	0.00082	0.548967	474.3	4.93	474.4	7.41	474.3	43.98	474.3	4.93
	Longmac1-61	2.87	13.83	0.20752	0.60194	0.01527	0.07681	0.00082	0.420833	477	4.93	478.5	9.68	484.6	58.25	477	4.93
	Longmac1-73	5.57	11.98	0.464942	0.66222	0.01142	0.08155	0.00079	0.561745	505.4	4.73	516	6.98	563.4	39.23	505.4	4.73
	Longmac1-36	15.07	17.74	0.849493	0.66108	0.01232	0.08246	0.00078	0.507568	510.8	4.67	515.3	7.53	535	43.18	510.8	4.67
	Longmac1-11	7.85	13.82	0.568017	0.65604	0.01061	0.08253	0.0008	0.599367	511.2	4.77	512.2	6.51	516.6	37.04	511.2	4.77
	Longmac1-69	10.2	29.81	0.342167	0.659	0.01058	0.0834	0.00083	0.619886	516.4	4.93	514	6.48	503.2	36.49	516.4	4.93
	Longmac1-71	2.05	2.71	0.756458	0.71726	0.02466	0.0884	0.00107	0.352059	546.1	6.35	549	14.58	561.5	75.97	546.1	6.35
	Longmac1-32	11.02	14.62	0.753762	0.71607	0.01106	0.0908	0.00085	0.606085	560.3	5.04	548.3	6.55	498.8	35.74	560.3	5.04
	Longmac1-38	8.99	26.69	0.33683	0.74932	0.0114	0.09196	0.00091	0.650436	567.1	5.39	567.8	6.62	570.9	34.06	567.1	5.39
	Longmac1-17	4.04	10.78	0.374768	0.84923	0.02096	0.10263	0.00122	0.481637	629.8	7.15	624.2	11.51	604.3	53.2	629.8	7.15
	Longmac1-68	6.32	12.26	0.515498	0.85527	0.01361	0.10454	0.00098	0.5891	641	5.73	627.5	7.45	579.7	36.59	641	5.73
	Longmac1-56	2.93	6.41	0.457098	1.05249	0.0425	0.11925	0.00165	0.342653	726.3	9.5	730.1	21.02	742	86.15	726.3	9.5
	Longmac1-4	1.38	3.97	0.347607	1.45715	0.02689	0.14727	0.0016	0.588734	885.6	8.97	912.8	11.11	979.7	37.92	885.6	8.97
	Longmac1-39	21.35	16.09	1.32691	1.90565	0.03383	0.18671	0.00196	0.59133	1103.6	10.64	1083.1	11.82	1042.4	36.46	1042.4	36.46
	Longmac1-70	1.47	5.83	0.252144	2.15373	0.03473	0.20508	0.00193	0.583607	1202.6	10.35	1166.3	11.18	1099.6	34.36	1099.6	34.36
	Longmac1-63	5.04	3.66	1.37705	2.45238	0.04178	0.22096	0.00215	0.571142	1287	11.33	1258.1	12.29	1209.4	35.32	1209.4	35.32
	Longmac1-52	23.97	31.02	0.772727	2.8059	0.04122	0.22518	0.00218	0.659008	1309.2	11.45	1357.1	11	1433.6	29.35	1433.6	29.35
	Longmac1-58	6.15	13.4	0.458955	7.94088	0.10951	0.404	0.00392	0.70359	2187.4	18.01	2224.3	12.44	2258.6	24.93	2258.6	24.93
	Longmac1-29	16.46	19.07	0.863136	12.9743	0.25572	0.50336	0.00483	0.486842	2628.2	20.69	2677.8	18.58	2715.7	34.08	2715.7	34.08
	Longmac1-59	8.13	12.2	0.666393	12.9186	0.16432	0.51961	0.00485	0.733818	2697.5	20.57	2673.7	11.99	2656	22.52	2656	22.52
	Longmac1-6	9.28	12.69	0.731284	19.9322	0.23746	0.62658	0.00617	0.826558	3136	24.47	3088.1	11.52	3057.3	19.5	3057.3	19.5

## Sheet: 1J
		U-Pb LA-ICPMS detrital zircon data
		Sample Location: GSQ Maneroo-1 core (sample name: Maneroo-331; collected from core box 331), Maneroo, Queensland
		Formation: Preserved middle Mackunda Formation
		Samples Description: Fine-grained silstone to silty-mudstone; collected (depth of 342.2-343.3, box 331)
		Sample #	Th	U	Th/U	Pb207	±	Pb206	±	Error	Pb206	± 1σ	Pb207	± 1σ	Pb207	± 1σ	Preferred	± 1σ
		GSQ Maneroo-331	(In PPM)	(In PPM)		/U235	1σ	/U238	1σ	Corr.	/U238 *1	(Ma)	/U235	(Ma)	/Pb206	(Ma)	Age	(Ma)
		Maneroo-331_037	1.54	96.74	0.015919	0.13498	0.00679	0.02013	0.00028	0.276512	128.4	1.78	129.6	117.86	129.6	117.86	128.4	1.78
		Maneroo-331_099	4.74	342.37	0.0138447	0.13952	0.00761	0.02075	0.00031	0.273902	132.4	1.93	137.2	125.48	137.2	125.48	132.4	1.93
		Maneroo-331_054	1.101	69.63	0.0158121	0.14086	0.00691	0.02097	0.00027	0.262467	133.8	1.69	135.4	114.75	135.4	114.75	133.8	1.69
		Maneroo-331_089	0.899	60.77	0.0147935	0.14097	0.00781	0.02106	0.00031	0.265692	134.4	1.93	126.7	128.38	126.7	128.38	134.4	1.93
		Maneroo-331_095	1.99	108.79	0.0182921	0.16997	0.00726	0.02462	0.0003	0.285278	156.8	1.89	199.3	98.48	199.3	98.48	156.8	1.89
		Maneroo-331_016	1.24	74.45	0.0166555	0.17599	0.01247	0.02589	0.00049	0.267107	164.8	3.07	163	161.69	163	161.69	164.8	3.07
		Maneroo-331_044	5.7	282.37	0.0201863	0.17754	0.00673	0.02608	0.0003	0.303455	166	1.89	165.4	90.99	165.4	90.99	166	1.89
		Maneroo_331_013	4.67	228.83	0.0204082	0.18861	0.0052	0.0269	0.00027	0.36406	171.1	1.71	234.1	65.91	234.1	65.91	171.1	1.71
		Maneroo_331_063	3.23	128.67	0.025103	0.25466	0.00644	0.03609	0.00033	0.361578	228.5	2.05	249.7	60.49	249.7	60.49	228.5	2.05
		Maneroo_331_061	6.14	193.8	0.0316821	0.26485	0.01692	0.03635	0.00063	0.271291	230.2	3.89	323.1	141.78	323.1	141.78	230.2	3.89
		Maneroo_331_005	7.14	329.04	0.0216995	0.26389	0.00622	0.03646	0.00036	0.418908	230.8	2.27	307.2	55.27	307.2	55.27	230.8	2.27
		Maneroo-331_071	2.96	106.24	0.0278614	0.27119	0.01111	0.03713	0.00045	0.295833	235	2.8	328.4	93.05	328.4	93.05	235	2.8
		Maneroo-331_088	4.83	175.32	0.0275496	0.26734	0.00937	0.03835	0.00043	0.31991	242.6	2.66	221.9	81.18	221.9	81.18	242.6	2.66
		Maneroo-331_047	2.44	88.36	0.0276143	0.26933	0.01153	0.03839	0.00048	0.292064	242.9	2.99	235.8	100.49	235.8	100.49	242.9	2.99
		Maneroo-331_067	8.61	282.21	0.0305092	0.27405	0.00659	0.03868	0.00035	0.376293	244.6	2.18	259.2	57.47	259.2	57.47	244.6	2.18
		Maneroo-331_081	3.04	108.51	0.0280159	0.28043	0.00885	0.03894	0.00041	0.333633	246.3	2.53	296	72.75	296	72.75	246.3	2.53
		Maneroo-331_018	3.72	116.72	0.0318711	0.28096	0.00956	0.03945	0.00044	0.327787	249.4	2.73	270.3	79.42	270.3	79.42	249.4	2.73
		Maneroo-331_062	0.944	38.92	0.0242549	0.27842	0.0148	0.03946	0.00058	0.276509	249.5	3.59	249.9	121.08	249.9	121.08	249.5	3.59
		Maneroo-331_077	4.68	149.9	0.0312208	0.29158	0.01214	0.04049	0.00049	0.290661	255.9	3.06	296.5	95.04	296.5	95.04	255.9	3.06
		Maneroo-331_021	2.52	82.1	0.0306943	0.29397	0.01355	0.0407	0.00055	0.293178	257.2	3.43	302.1	106.17	302.1	106.17	257.2	3.43
		Maneroo-331_045	9.93	316.61	0.0313635	0.29832	0.01275	0.04159	0.00054	0.303792	262.7	3.36	286.4	100.32	286.4	100.32	262.7	3.36
		Maneroo-331_075	0.694	17.42	0.0398393	0.29642	0.02015	0.04167	0.0007	0.247119	263.2	4.32	268	152.35	268	152.35	263.2	4.32
		Maneroo-331_059	6.03	141.78	0.0425307	0.30357	0.00999	0.04264	0.00044	0.313566	269.2	2.74	270	77.03	270	77.03	269.2	2.74
		Maneroo-331_003	2.99	72.35	0.0413269	0.31648	0.01684	0.04309	0.00065	0.283492	272	4.02	339.9	118.74	339.9	118.74	272	4.02
		Maneroo-331_100	11.42	336.5	0.0339376	0.30849	0.00904	0.04369	0.00044	0.343671	275.6	2.69	251.6	67.66	251.6	67.66	275.6	2.69
		Maneroo-331_009	1.077	43.02	0.0250349	0.31425	0.0213	0.04463	0.00075	0.247931	281.4	4.61	244	152.61	244	152.61	281.4	4.61
		Maneroo-331_064	5.95	167.98	0.0354209	0.31782	0.00895	0.04474	0.00044	0.349233	282.2	2.7	264.8	66.44	264.8	66.44	282.2	2.7
		Maneroo-331_008	1.134	35.55	0.0318987	0.3288	0.00694	0.04478	0.00043	0.454943	282.4	2.63	339.5	50.05	339.5	50.05	282.4	2.63
		Maneroo-331_019	1.82	54.52	0.0333822	0.32962	0.01649	0.04492	0.00065	0.289245	283.3	3.99	338.5	113.24	338.5	113.24	283.3	3.99
		Maneroo-331_091	9.32	286.17	0.0325681	0.31944	0.00949	0.04497	0.00046	0.344317	283.5	2.81	264.9	68.63	264.9	68.63	283.5	2.81
		Maneroo-331_084	2.35	72.29	0.032508	0.32889	0.00958	0.04576	0.00047	0.352612	288.4	2.91	291.6	67.23	291.6	67.23	288.4	2.91
		Maneroo-331_033	4.58	127.26	0.0359893	0.33025	0.01126	0.04599	0.00051	0.325245	289.9	3.12	288.9	79.01	288.9	79.01	289.9	3.12
		Maneroo-331_087	3.9	108.86	0.0358258	0.33566	0.00893	0.04635	0.00044	0.356822	292.1	2.72	309.2	61.83	309.2	61.83	292.1	2.72
		Maneroo-331_069	4.15	128.66	0.0322556	0.33408	0.0224	0.04649	0.00081	0.259853	292.9	5	291.1	149.48	291.1	149.48	292.9	5
		Maneroo-331_056	2.16	62.4	0.0346154	0.33853	0.01101	0.04713	0.0005	0.326199	296.9	3.08	290.4	75.65	290.4	75.65	296.9	3.08
		Maneroo-331_023	1.53	43.7	0.0350114	0.34587	0.0134	0.04715	0.00056	0.306559	297	3.44	337.9	90.14	337.9	90.14	297	3.44
		Maneroo-331_049	20.84	562.89	0.0370232	0.34802	0.01309	0.0484	0.00058	0.318601	304.7	3.55	292.9	89.56	292.9	89.56	304.7	3.55
		Maneroo-331_030	3.59	91.87	0.039077	0.34801	0.01113	0.04856	0.00051	0.328389	305.7	3.11	284.4	74.37	284.4	74.37	305.7	3.11
		Maneroo-331_039	1.76	46.11	0.0381696	0.35271	0.01216	0.04894	0.00054	0.320047	308	3.3	296.9	80.18	296.9	80.18	308	3.3
		Maneroo-331_031	4.14	104.57	0.0395907	0.36792	0.0181	0.04978	0.0007	0.285837	313.2	4.27	355.8	110.02	355.8	110.02	313.2	4.27
		Maneroo-331_078	4.35	211.1	0.0206063	0.36177	0.01219	0.04989	0.00056	0.333122	313.9	3.42	312.3	76.78	312.3	76.78	313.9	3.42
		Maneroo-331_035	6.22	133.22	0.0466897	0.36279	0.01301	0.0507	0.00056	0.308005	318.8	3.44	281.9	83.45	281.9	83.45	318.8	3.44
		Maneroo-331_038	3.18	81.8	0.0388753	0.3736	0.01365	0.05106	0.00059	0.316261	321	3.62	331.2	84.2	331.2	84.2	321	3.62
		Maneroo-331_066	15.4	409.87	0.0375729	0.37379	0.01573	0.05128	0.00066	0.30584	322.4	4.02	324.2	95.13	324.2	95.13	322.4	4.02
		Maneroo-331_072	11.07	282.83	0.0391401	0.38944	0.01365	0.05326	0.00059	0.316052	334.5	3.62	331	80.13	331	80.13	334.5	3.62
		Maneroo-331_043	1.065	24.63	0.04324	0.39594	0.01436	0.05378	0.0006	0.307614	337.7	3.7	345.5	83.98	345.5	83.98	337.7	3.7
		Maneroo-331_017	13.03	318.09	0.0409632	0.40831	0.01457	0.05477	0.00065	0.332584	343.7	3.99	373.9	81.35	373.9	81.35	343.7	3.99
		Maneroo-331_034	3.48	82.04	0.0424183	0.40541	0.01354	0.05505	0.0006	0.32634	345.4	3.69	346	76.74	346	76.74	345.4	3.69
		Maneroo-331_068	0.932	20.05	0.0464838	0.4325	0.01858	0.05729	0.0007	0.28442	359.1	4.28	403	96.13	403	96.13	359.1	4.28
		Maneroo-331_070	7.1	137.91	0.0514829	0.45699	0.01269	0.06109	0.00059	0.347798	382.2	3.57	382.8	64.01	382.8	64.01	382.2	3.57
		Maneroo-331_042	1.78	34.8	0.0511494	0.48523	0.01584	0.06572	0.00069	0.321621	410.3	4.15	352.5	75.74	352.5	75.74	410.3	4.15
		Maneroo-331_036	1.58	32	0.049375	0.5108	0.02479	0.06662	0.00092	0.284549	415.7	5.55	438.1	108.92	438.1	108.92	415.7	5.55
		Maneroo-331_028	4.43	81.28	0.054503	0.52105	0.01677	0.06695	0.00073	0.338781	417.8	4.4	469	72.18	469	72.18	417.8	4.4
		Maneroo-331_001	13.84	361.32	0.038304	0.53452	0.00929	0.06831	0.00065	0.547491	426	3.94	481.2	40.57	481.2	40.57	426	3.94
		Maneroo-331_040	5.49	98.26	0.0558722	0.52233	0.01962	0.06861	0.0008	0.310419	427.8	4.82	421	86	421	86	427.8	4.82
		Maneroo-331_032	2.45	41.99	0.0583472	0.52509	0.01351	0.06879	0.00065	0.367254	428.8	3.91	426.7	59.12	426.7	59.12	428.8	3.91
		Maneroo-331_074	2.73	50.3	0.0542744	0.53287	0.01528	0.06945	0.00069	0.346477	432.8	4.14	438.8	65.29	438.8	65.29	432.8	4.14
		Maneroo-331_080	5.23	108.84	0.0480522	0.52531	0.02381	0.06954	0.00096	0.304574	433.4	5.81	403.8	100.49	403.8	100.49	433.4	5.81
		Maneroo-331_010	26.96	308.53	0.0873821	0.55285	0.01316	0.07069	0.0007	0.415998	440.3	4.23	480.1	55.04	480.1	55.04	440.3	4.23
		Maneroo-331_058	3.5	76.17	0.0459498	0.54529	0.0191	0.07086	0.00082	0.330375	441.3	4.92	445.3	79.09	445.3	79.09	441.3	4.92
		Maneroo-331_048	9.93	186.33	0.0532925	0.55175	0.02047	0.07139	0.00081	0.305824	444.5	4.86	454.6	85.31	454.6	85.31	444.5	4.86
		Maneroo-331_050	1.59	28.92	0.0549793	0.56164	0.02696	0.07287	0.00101	0.288743	453.4	6.09	448.4	109.02	448.4	109.02	453.4	6.09
		Maneroo-331_090	6.51	129.85	0.0501348	0.57137	0.01801	0.07381	0.00079	0.339559	459.1	4.76	458.5	70.3	458.5	70.3	459.1	4.76
		Maneroo-331_093	6.58	115.74	0.0568516	0.59869	0.01723	0.07645	0.00076	0.345424	474.9	4.53	483.8	65.08	483.8	65.08	474.9	4.53
		Maneroo-331_025	9	162.14	0.0555076	0.61291	0.02018	0.0783	0.0009	0.349105	486	5.36	482.4	76.86	482.4	76.86	486	5.36
		Maneroo-331_004	14.45	798.15	0.0181044	0.61476	0.02212	0.07909	0.00097	0.340856	490.7	5.78	466.3	81.22	466.3	81.22	490.7	5.78
		Maneroo-331_022	2.19	33.86	0.0646781	0.70573	0.02189	0.08608	0.00095	0.355807	532.3	5.62	584.3	70.08	584.3	70.08	532.3	5.62
		Maneroo-331_057	57096.9	929166	0.0614496	0.72954	0.02422	0.09019	0.00104	0.347336	556.7	6.14	554.9	73.88	554.9	73.88	556.7	6.14
		Maneroo-331_029	2.21	35.91	0.0615427	0.74916	0.03292	0.09223	0.00122	0.301025	568.7	7.17	565.5	95.42	565.5	95.42	568.7	7.17
		Maneroo-331_076	8.91	100.78	0.0884104	0.98725	0.05679	0.11442	0.00189	0.287154	698.4	10.94	694.8	120.85	694.8	120.85	698.4	10.94
		Maneroo-331_094	10.01	92.16	0.108615	1.63707	0.05108	0.1637	0.00178	0.348488	977.3	9.88	1001.6	63.24	1001.6	63.24	977.3	9.88
		Maneroo-331_014	10.22	86.16	0.118617	1.75741	0.04364	0.17294	0.0017	0.39586	1028.3	9.37	1033.4	51.7	1033.4	51.7	1033.4	51.7
		Maneroo-331_026	2.09	14.7	0.142177	2.05979	0.10524	0.19046	0.00317	0.32576	1123.9	17.15	1157.5	103.29	1157.5	103.29	1157.5	103.29
		Maneroo-331_055	2.66	17.8	0.149438	2.02975	0.07028	0.19924	0.00239	0.346443	1171.2	12.87	1039.1	71.26	1039.1	71.26	1039.1	71.26
		Maneroo-331_065	4.29	26.93	0.159302	3.26126	0.08601	0.24749	0.00231	0.353908	1425.5	11.92	1540.1	51.51	1540.1	51.51	1540.1	51.51
		Maneroo-331_085	21.42	116.76	0.183453	3.67511	0.09416	0.27221	0.00262	0.375665	1552	13.28	1585.5	48.89	1585.5	48.89	1585.5	48.89
		Maneroo-331_046	13.17	64.49	0.204218	3.73958	0.1063	0.28144	0.00287	0.358745	1598.6	14.46	1555	56.74	1555	56.74	1555	56.74
		Maneroo-331_015	6.91	33.36	0.207134	4.69384	0.12833	0.31291	0.00338	0.395091	1755	16.6	1779.5	51.22	1779.5	51.22	1779.5	51.22
		Maneroo-331_073	11.19	43.77	0.255655	4.59151	0.13788	0.31684	0.00339	0.356298	1774.3	16.6	1716.8	56.56	1716.8	56.56	1716.8	56.56
		Maneroo-331_053	11.4	48.4	0.235537	5.44145	0.10744	0.32339	0.00278	0.435378	1806.3	13.55	1986.8	37.69	1986.8	37.69	1986.8	37.69
		Maneroo-331_086	15.97	64.35	0.248174	5.62913	0.12927	0.34826	0.00315	0.393868	1926.3	15.06	1915.2	42.66	1915.2	42.66	1915.2	42.66
		Maneroo-331_079	40.23	157.01	0.256226	10.2132	0.24114	0.42333	0.00402	0.402196	2275.6	18.22	2606.3	40.59	2606.3	40.59	2606.3	40.59
									Legend
					Mesozoic dated grains
					Paleozoic dated grains
					All grains older then 1Ga
				Notes:
				*Age is calculated by error propagation and included errors
				*U and U/Th concentrations are calculated against NIST 612 and are within ~20% error
				*Spot size: 32µm
				*Energy levels at 6 J/cm2 at 193 nm
				*All grains older then 1000 Ma, preferred ages are based on Pb207/Pb206
				*Grains younger then 350 Ma (based on Pb206/U238), which exhibited greater then ≥ 30% discordance
				or high common lead (Pb2006/Pb204 <1000) were excluded
				*Grains older then 350 Ma (based on Pb206/U238), which exhibited greater then ≥ 15% discordance
				or high common lead (Pb2006/Pb204 <1000) were excluded
				*1 Age correction completed by Isoplot (AGE7Corr)
