# Supplementary material
Source: publisher figshare collection journal article supplement (https://gsapubs.figshare.com/articles/dataset/_/12533480)
Supplement: Supplementary file 1 [file 1]

GSA Data Repository Item 2016095

Tucker, R.T., Roberts, E.M., Henderson, R.A., and Kemp, A.I.S., 2016, Large igneous province or long-lived magmatic arc along the eastern margin of Australia during the Cretaceous? Insights from the sedimentary record: GSA Bulletin, doi:10.1130/B31337.1.

## DATA REPOSITORY TABLES

Tables DR1A–1J. U-Pb LA-ICPMS results for all detrital zircon samples, including isotope and concentration data. Th (in ppm) is Thorium concentration measured in parts per million; U (in ppm) is Uranium concentration in parts per million. Both  $\text{Pb}^{207}/\text{U}^{235}$  and error calculated at  $\pm 1\sigma$  and  $\text{Pb}^{206}/\text{U}^{238}$  and error calculated at  $\pm 1\sigma$  were used to calculate the error correction (Error Corr.). The ratio values for  $\text{Pb}^{206}/\text{U}^{238}$ ,  $\text{Pb}^{207}/\text{Pb}^{206}$ , and  $\text{Pb}^{207}/\text{Pb}^{206}$  with all error calculated at  $\pm 1\sigma$ . For grains younger than 1 Ga, the preferred age is based on  $\text{Pb}^{206}/\text{U}^{238}$  at  $\pm 1\sigma$  error, whereas for grains older 1 Ga the preferred age is based on  $\text{Pb}^{207}/\text{Pb}^{206}$  at  $\pm 1\sigma$  error. Age is calculated by error in standard reproducibility and U concentration and U/Th ratio are calculated against NIST 612 and are within ~30% error.

Table DR2. Laser ablation Lu-Hf data for selected detrital zircons.

Table DR3. Laser ablation Lu-Hf data for reference zircons.
